# Supplementary material for: Global availability of data on HPV genotype-distribution in cervical, vulvar and vaginal disease and genotype-specific prevalence and incidence of HPV infection in females
Source: Springer Nature journal article supplement (doi:10.1186/s13027-015-0008-y), 2015-04-24
Supplement: MOESM1 [file 25661822]

## 1 SUPPLEMENTARY MATERIAL

*Full list of 727 references by world region*

### 1.1 Africa

Abate E, Aseffa A, El-Tayeb M, El-Hassan I, Yamuah L, Mihret W, et al. Genotyping of human papillomavirus in paraffin embedded cervical tissue samples from women in Ethiopia and the Sudan. *J Med Virol* 2013;85(2):282-7.

Abd El-Azim S, Lotfy M, Omr A. Detection of human papillomavirus genotypes in cervical intraepithelial neoplasia and invasive cancer patients: Sharkia Governorate, Egypt. *Clin Lab* 2011;57(5-6):363-71.

Adjorlolo-Johnson G, Unger ER, Boni-Ouattara E, Toure-Coulibaly K, Maurice C, Vernon SD, et al. Assessing the relationship between HIV infection and cervical cancer in Cote d'Ivoire: a case-control study. *BMC Infect Dis* 2010;10:242.

Akarolo-Anthony SN, Al-Mujtaba M, Famooto AO, Dareng EO, Olaniyan OB, Offiong R, et al. HIV associated high-risk HPV infection among Nigerian women. *BMC Infect Dis* 2013;13:521.

Alhamany Z, El Mzibri M, Kharbach A, Malihy A, Abouqal R, Jaddi H, et al. Prevalence of human papillomavirus genotype among Moroccan women during a local screening program. *J Infect Dev Ctries* 2010;4(11):732-9.

Allan B, Marais DJ, Hoffman M, Shapiro S, Williamson AL. Cervical human papillomavirus (HPV) infection in South African women: implications for HPV screening and vaccine strategies. *J Clin Microbiol* 2008;46(2):740-2.

Attoh S, Asmah R, Wiredu EK, Gyasi R, Tettey Y. Human papilloma virus genotypes in Ghanaian women with cervical carcinoma. *East Afr Med J* 2010;87(8):345-9.

Baay MF, Kjetland EF, Ndhlovu PD, Deschoolmeester V, Mduluza T, Gomo E, et al. Human papillomavirus in a rural community in Zimbabwe: the impact of HIV co-infection on HPV genotype distribution. *J Med Virol* 2004;73(3):481-5.

Banura C, Franceschi S, Doorn LJ, Arslan A, Wabwire-Mangen F, Mbidde EK, et al. Infection with human papillomavirus and HIV among young women in Kampala, Uganda. *J Infect Dis* 2008;197(4):555-62.

Banura C, Sandin S, Van Doorn LJ, Quint W, Kleter B, Wabwire-Mangen F, et al. Type-specific incidence, clearance and predictors of cervical human papillomavirus infections (HPV) among young women: a prospective study in Uganda. *Infect Agent Cancer* 2010;5:7.

Bayo S, Bosch FX, de Sanjose S, Munoz N, Combita AL, Coursaget P, et al. Risk factors of invasive cervical cancer in Mali. *Int J Epidemiol* 2002;31(1):202-9.

Bekele A, Baay M, Mekonnen Z, Suleman S, Chatterjee S. Human papillomavirus type distribution among women with cervical pathology - a study over 4 years at Jimma Hospital, southwest Ethiopia. *Trop Med Int Health* 2010;15(8):890-3.

- Castellsague X, Menendez C, Loscertales MP, Kornegay JR, dos SF, Gomez-Olive FX, et al. Human papillomavirus genotypes in rural Mozambique. *Lancet* 2001;358(9291):1429-30.
- Castellsague X, Klaustermeier J, Carrilho C, Albero G, Sacarlal J, Quint W, et al. Vaccine-related HPV genotypes in women with and without cervical cancer in Mozambique: burden and potential for prevention. *Int J Cancer* 2008;122(8):1901-4.
- Dartell M, Rasch V, Kahesa C, Mwaiselage J, Ngoma T, Junge J, et al. Human papillomavirus prevalence and type distribution in 3603 HIV-positive and HIV-negative women in the general population of Tanzania: the PROTECT study. *Sex Transm Dis* 2012;39(3):201-8.
- De Vuyst H, Steyaert S, Van Renterghem L, Claeys P, Muchiri L, Sitati S, et al. Distribution of human papillomavirus in a family planning population in Nairobi, Kenya. *Sex Transm Dis* 2003;30(2):137-42.
- De Vuyst H, Gichangi P, Estambale B, Njuguna E, Franceschi S, Temmerman M. Human papillomavirus types in women with invasive cervical carcinoma by HIV status in Kenya. *Int J Cancer* 2008;122(1):244-6.
- De Vuyst H, Parisi MR, Karani A, Mandaliya K, Muchiri L, Vaccarella S, et al. The prevalence of human papillomavirus infection in Mombasa, Kenya. *Cancer Causes Control* 2010;21(12):2309-13.
- De Vuyst H, Ndirangu G, Moodley M, Tenet V, Estambale B, Meijer CJ, et al. Prevalence of human papillomavirus in women with invasive cervical carcinoma by HIV status in Kenya and South Africa. *Int J Cancer* 2012;131(4):949-55.
- Denny L, Adewole I, Anorlu R, Dreyer G, Moodley M, Smith T, et al. Human papillomavirus prevalence and type distribution in invasive cervical cancer in sub-Saharan Africa. *Int J Cancer* 2014;134(6):1389-98.
- Desruisseau AJ, Schmidt-Grimminger D, Welty E. Epidemiology of HPV in HIV-positive and HIV-negative fertile women in Cameroon, West Africa. *Infect Dis Obstet Gynecol* 2009;2009:810596.
- Ezechi OC, Ostergren PO, Nwaokorie FO, Ujah IA, Odberg PK. The burden, distribution and risk factors for cervical oncogenic human papilloma virus infection in HIV positive Nigerian women. *Virol J* 2014;11(1):5.
- Famooto A, Almujtaba M, Dareng E, Akarolo-Anthony S, Ogbonna C, Offiong R, et al. RPS19 and TYMS SNPs and Prevalent High Risk Human Papilloma Virus Infection in Nigerian Women. *PLoS One* 2013;8(6):e66930.
- Fanta BE. The distribution of Human Papilloma Virus infection in women with cervical histological abnormalities from an area with high incidence of cervical cancer. *Ethiop Med J* 2005;43(3):151-8.
- Fukuchi E, Sawaya GF, Chirenje M, Magure T, Tuveson J, Ma Y, et al. Cervical Human Papillomavirus Incidence and Persistence in a Cohort of HIV-Negative Women in Zimbabwe. *Sex Transm Dis* 2009;36(5):305-11.
- Gage JC, Ajenifuja KO, Wentzensen NA, Adepiti AC, Eklund C, Reilly M, et al. The age-specific prevalence of human papillomavirus and risk of cytologic abnormalities in rural Nigeria: implications for screen-and-treat strategies. *Int J Cancer* 2012;130(9):2111-7.
- Hammouda D, Munoz N, Herrero R, Arslan A, Bouhadeh A, Oublil M, et al. Cervical carcinoma in Algiers, Algeria: human papillomavirus and lifestyle risk factors. *Int J Cancer* 2005;113(3):483-9.

- Hammouda D, Clifford GM, Pallardy S, Ayyach G, Chekiri A, Boudrich A, et al. Human papillomavirus infection in a population-based sample of women in Algiers, Algeria. *Int J Cancer* 2011;128(9):2224-9.
- Hanisch RA, Sow PS, Toure M, Dem A, Dembele B, Toure P, et al. Influence of HIV-1 and/or HIV-2 infection and CD4 count on cervical HPV DNA detection in women from Senegal, West Africa. *J Clin Virol* 2013;58(4):696-702.
- Houlihan CF, de SS, Baisley K, Changalucha J, Ross DA, Kapiga S, et al. Prevalence of Human Papillomavirus in Adolescent Girls Before Reported Sexual Debut. *J Infect Dis* 2014;210(6):837-45.
- Jaquet A, Horo A, Charbonneau V, Ekouevi DK, Roncin L, Toure B, et al. Cervical human papillomavirus and HIV infection in women of child-bearing age in Abidjan, Cote d'Ivoire, 2010. *Br J Cancer* 2012;107(3):556-63.
- Jones HE, Allan BR, van de Wijgert JH, Altini L, Taylor SM, de Kock A, et al. Agreement between self- and clinician-collected specimen results for detection and typing of high-risk human papillomavirus in specimens from women in Gugulethu, South Africa. *J Clin Microbiol* 2007;45(6):1679-83.
- Kay P, Soeters R, Nevin J, Denny L, Dehaeck CM, Williamson AL. High prevalence of HPV 16 in South African women with cancer of the cervix and cervical intraepithelial neoplasia. *J Med Virol* 2003;71(2):265-73.
- Keita N, Clifford GM, Koulibaly M, Douno K, Kabba I, Haba M, et al. HPV infection in women with and without cervical cancer in Conakry, Guinea. *Br J Cancer* 2009;101(1):202-8.
- Khair MM, Mzibri ME, Mhand RA, Benider A, Benchekroun N, Fahime EM, et al. Molecular detection and genotyping of human papillomavirus in cervical carcinoma biopsies in an area of high incidence of cancer from Moroccan women. *J Med Virol* 2009;81(4):678-84.
- KrennHrubec K, Mrad K, Sriha B, Ben Ayed F, Bottalico DM, Ostolaza J, et al. HPV types and variants among cervical cancer tumors in three regions of Tunisia. *J Med Virol* 2011;83(4):651-7.
- Marais DJ, Constant D, Allan B, Carrara H, Hoffman M, Shapiro S, et al. Cervical human papillomavirus (HPV) infection and HPV type 16 antibodies in South African women. *J Clin Microbiol* 2008;46(2):732-9.
- Marais DJ, Passmore JA, Denny L, Sampson C, Allan BR, Williamson AL. Cervical and oral human papillomavirus types in HIV-1 positive and negative women with cervical disease in South Africa. *J Med Virol* 2008;80(6):953-9.
- Maranga IO, Hampson L, Oliver AW, He X, Gichangi P, Rana F, et al. HIV Infection Alters the Spectrum of HPV Subtypes Found in Cervical Smears and Carcinomas from Kenyan Women. *Open Virol J* 2013;7:19-27.
- Mbaye EHS, Gheit T, Dem A, McKay-Chopin S, Toure-Kane NC, Mboup S, et al. Human papillomavirus infection in women in four regions of Senegal. *J Med Virol* 2014;86(2):248-56.
- McDonald AC, Denny L, Wang C, Tsai WY, Wright TC, Jr., Kuhn L. Distribution of high-risk human papillomavirus genotypes among HIV-negative women with and without cervical intraepithelial neoplasia in South Africa. *PLoS ONE* 2012;7(9):e44332.
- Meftah El Khair MM, Ait Mhand R, Mzibri ME, Ennaji MM. Risk factors of invasive cervical cancer in Morocco. *Cell Mol Biol (Noisy -le-grand)* 2009;55 Suppl:OL1175-OL1185.

- Naucner P, Mabota da CF, da Costa JL, Ljungberg O, Bugalho A, Dillner J. Human papillomavirus type-specific risk of cervical cancer in a population with high human immunodeficiency virus prevalence: case-control study. *J Gen Virol* 2011;92(Pt 12):2784-91.
- Ndiaye C, Alemany L, Ndiaye N, Kamate B, Diop Y, Odida M, et al. Human papillomavirus distribution in invasive cervical carcinoma in sub-Saharan Africa: could HIV explain the differences? *Trop Med Int Health* 2012;17(12):1432-40.
- Ng'andwe C, Lowe JJ, Richards PJ, Hause L, Wood C, Angeletti PC. The distribution of sexually-transmitted Human Papillomaviruses in HIV positive and negative patients in Zambia, Africa. *BMC Infect Dis* 2007;7:77.
- Odida M, de Sanjose S, Quint W, Bosch XF, Klaustermeier J, Weiderpass E. Human Papillomavirus type distribution in invasive cervical cancer in Uganda. *BMC Infect Dis* 2008;8:85.
- Odida M, Sandin S, Mirembe F, Kleter B, Quint W, Weiderpass E. HPV types, HIV and invasive cervical carcinoma risk in Kampala, Uganda: a case-control study. *Infect Agent Cancer* 2011;6(1):8.
- Okolo C, Franceschi S, Adewole I, Thomas JO, Follen M, Snijders PJ, et al. Human papillomavirus infection in women with and without cervical cancer in Ibadan, Nigeria. *Infect Agent Cancer* 2010;5(1):24.
- Passmore JA, Marais DJ, Sampson C, Allan B, Parker N, Milner M, et al. Cervicovaginal, oral, and serum IgG and IgA responses to human papillomavirus type 16 in women with cervical intraepithelial neoplasia. *J Med Virol* 2007;79(9):1375-80.
- Pegoraro RJ, Rom L, Lanning PA, Moodley M, Naiker S, Moodley J. P53 codon 72 polymorphism and human papillomavirus type in relation to cervical cancer in South African women. *Int J Gynecol Cancer* 2002;12(4):383-8.
- Piras F, Piga M, De MA, Zannou AR, Minerba L, Perra MT, et al. Prevalence of human papillomavirus infection in women in Benin, West Africa. *Virol J* 2011;8:514.
- Safaeian M, Kiddugavu M, Gravitt PE, Gange SJ, Ssekasanvu J, Murokora D, et al. Prevalence and risk factors for carcinogenic human papillomavirus infections in rural Rakai, Uganda. *Sex Transm Infect* 2008;84(4):306-11.
- Safaeian M, Kiddugavu M, Gravitt PE, Gange SJ, Ssekasanvu J, Murokora D, et al. Determinants of incidence and clearance of high-risk human papillomavirus infections in rural Rakai, Uganda. *Cancer Epidemiol Biomarkers Prev* 2008;17(6):1300-7.
- Said HMA. HPV genotypes in women with squamous intraepithelial lesions and normal cervixes participating in a community-based microbicide study in Pretoria, South Africa. *J Clin Virol* 2009;44(4):318-21.
- Stanczuk GA, Kay P, Sibanda E, Allan B, Chirara M, Tswana SA, et al. Typing of human papillomavirus in Zimbabwean patients with invasive cancer of the uterine cervix. *Acta Obstet Gynecol Scand* 2003;82(8):762-6.
- Tesfalul M, Simbiri K, Wheat CM, Motsepe D, Goldbach H, Armstrong K, et al. Oncogenic viral prevalence in invasive vulvar cancer specimens from human immunodeficiency virus-positive and -negative women in Botswana. *Int J Gynecol Cancer* 2014;24(4):758-65.

- Thomas JO, Herrero R, Omigbodun AA, Ojemakinde K, Ajayi IO, Fawole A, et al. Prevalence of papillomavirus infection in women in Ibadan, Nigeria: a population-based study. *Br J Cancer* 2004;90(3):638-45.
- Veldhuijzen NJ, Dhont N, Vyankandondera J, Gasarabwe A, Busasa R, Crucitti T, et al. Prevalence and concordance of HPV, HIV, and HSV-2 in heterosexual couples in Kigali, Rwanda. *Sex Transm Dis* 2012;39(2):128-35.
- Vidal AC, Murphy SK, Hernandez BY, Vasquez B, Bartlett JA, Oneko O, et al. Distribution of HPV genotypes in cervical intraepithelial lesions and cervical cancer in Tanzanian women. *Infect Agent Cancer* 2011;6(1):20.
- Watson-Jones D, Baisley K, Brown J, Kavishe B, Andreasen A, Chagalucha J, et al. High prevalence and incidence of human papillomavirus in a cohort of healthy young African female subjects. *Sex Transm Infect* 2013;89(5):358-65.
- Wawer MJ, Tobian AA, Kigozi G, Kong X, Gravitt PE, Serwadda D, et al. Effect of circumcision of HIV-negative men on transmission of human papillomavirus to HIV-negative women: a randomised trial in Rakai, Uganda. *Lancet* 2011;377(9761):209-18.
- Zohoncon TM, Bisseye C, Djigma FW, Yonli AT, Compaore TR, Sagna T, et al. Prevalence of HPV High-Risk Genotypes in Three Cohorts of Women in Ouagadougou (Burkina Faso). *Mediterr J Hematol Infect Dis* 2013;5(1):e2013059.

## **1.2 Asia-Pacific**

- Abe S, Miura K, Kinoshita A, Mishima H, Miura S, Yamasaki K, et al. Single human papillomavirus 16 or 52 infection and later cytological findings in Japanese women with NILM or ASC-US. *J Hum Genet* 2014;59(5):251-5.
- Abudukadeer A, Ding Y, Niyazi M, Ababaikeli A, Abudula A. Distribution of HPV genotypes in uterine cervical lesions among the Uighur women in Xinjiang province of China. *Eur J Gynaecol Oncol* 2010;31(3):315-8.
- Aggarwal R, Gupta S, Nijhawan R, Suri V, Kaur A, Bhasin V, et al. Prevalence of high-risk human papillomavirus infections in women with benign cervical cytology: a hospital based study from North India. *Indian J Cancer* 2006;43(3):110-6.
- Akcali S, Goker A, Ecemis T, Kandiloglu AR, Sanlidag T. Human papilloma virus frequency and genotype distribution in a Turkish population. *Asian Pac J Cancer Prev* 2013;14(1):503-6.
- Al-Ahdal MN, Al-Arnous WK, Bohol MF, Abuzaid SM, Shoukri MM, Elrady KS, et al. Human papillomaviruses in cervical specimens of women residing in Riyadh, Saudi Arabia: a hospital-based study. *J Infect Dev Ctries* 2014;8(3):320-5.
- Al Awadhi R, Chehadeh W, Kapila K. Prevalence of human papillomavirus among women with normal cervical cytology in Kuwait. *J Med Virol* 2011;83(3):453-60.
- Al-Badawi IA, Al-Suwaine A, Al-Aker M, Asaad L, Alaidan A, Tulbah A, et al. Detection and genotyping of human papilloma virus in cervical cancer specimens from Saudi patients. *Int J Gynecol Cancer* 2011;21(5):907-10.
- Alibegashvili T, Clifford GM, Vaccarella S, Baidoshvili A, Gogiashvili L, Tsagareli Z, et al. Human papillomavirus infection in women with and without cervical cancer in Tbilisi, Georgia. *Cancer Epidemiol* 2011;35(5):465-70.

- Alsbeih G, Ahmed R, Al Harbi N, Venturina LA, Tulbah A, Balaraj K. Prevalence and genotypes' distribution of human papillomavirus in invasive cervical cancer in Saudi Arabia. *Gynecol Oncol* 2011;121(3):522-6.
- An HJ, Cho NH, Lee SY, Kim IH, Lee C, Kim SJ, et al. Correlation of cervical carcinoma and precancerous lesions with human papillomavirus (HPV) genotypes detected with the HPV DNA chip microarray method. *Cancer* 2003;97(7):1672-80.
- An HJ, Kim KR, Kim IS, Kim DW, Park MH, Park IA, et al. Prevalence of human papillomavirus DNA in various histological subtypes of cervical adenocarcinoma: a population-based study. *Mod Pathol* 2005;18(4):528-34.
- Aruhuri B, Tarivonda L, Tenet V, Sinha R, Snijders P, Clifford G, et al. Prevalence of cervical human papillomavirus (HPV) infection in Vanuatu. *Cancer Prev Res (Phila)* 2012;5(5):746-53.
- Asato T, Maehama T, Nagai Y, Kanazawa K, Uezato H, Kariya K. A large case-control study of cervical cancer risk associated with human papillomavirus infection in Japan, by nucleotide sequencing-based genotyping. *J Infect Dis* 2004;189(10):1829-32.
- Aydin Y, Atis A, Tutuman T, Goker N. Prevalence of human papilloma virus infection in pregnant Turkish women compared with non-pregnant women. *Eur J Gynaecol Oncol* 2010;31(1):72-4.
- Bae JH, Lee SJ, Kim CJ, Hur SY, Park YG, Lee WC, et al. Human papillomavirus (HPV) type distribution in Korean women: a meta-analysis. *J Microbiol Biotechnol* 2008;18(4):788-94.
- Bao YP, Li N, Smith JS, Qiao YL. Human papillomavirus type distribution in women from Asia: a meta-analysis. *Int J Gynecol Cancer* 2008;18(1):71-9.
- Bao YP, Li N, Smith JS, Qiao YL. Human papillomavirus type-distribution in the cervix of Chinese women: a meta-analysis. *Int J STD AIDS* 2008;19(2):106-11.
- Baser E, Ozgu E, Erkilinc S, Togrul C, Caglar M, Gungor T. Risk factors for human papillomavirus persistence among women undergoing cold-knife conization for treatment of high-grade cervical intraepithelial neoplasia. *Int J Gynaecol Obstet* 2014;125(3):275-8.
- Basu P, Roychowdhury S, Bafna UD, Chaudhury S, Kothari S, Sekhon R, et al. Human papillomavirus genotype distribution in cervical cancer in India: results from a multi-center study. *Asian Pac J Cancer Prev* 2009;10(1):27-34.
- Bayram A, Erkilic S, Balat O, Eksi F, Ugur MG, Ozturk E, et al. Prevalence and genotype distribution of human papillomavirus in non-neoplastic cervical tissue lesion: cervical erosion. *J Med Virol* 2011;83(11):1997-2003.
- Bhatla N, Dar L, Patro AR, Kriplani A, Gulati A, Verma K, et al. Human papillomavirus type distribution in cervical cancer in Delhi, India. *Int J Gynecol Pathol* 2006;25(4):398-402.
- Bhatla N, Dar L, Rajkumar PA, Kumar P, Pati SK, Kriplani A, et al. Human papillomavirus-type distribution in women with and without cervical neoplasia in north India. *Int J Gynecol Pathol* 2008;27(3):426-30.
- Bhatla N, Lal N, Bao YP, Ng T, Qiao YL. A meta-analysis of human papillomavirus type-distribution in women from South Asia: implications for vaccination. *Vaccine* 2008;26(23):2811-7.

- Bhattarakosol P, Lertworapreecha M, Kitkumthorn N, Triratanachai S, Niruthisard S. Survey of human papillomavirus infection in cervical intraepithelial neoplasia in Thai women. *J Med Assoc Thai* 2002;85 Suppl 1:S360-S365.
- Brestovac B, Harnett GB, Smith DW, Shellam GR, Frost FA. Human papillomavirus genotypes and their association with cervical neoplasia in a cohort of Western Australian women. *J Med Virol* 2005;76(1):106-10.
- Brotherton JM. How much cervical cancer in Australia is vaccine preventable? A meta-analysis. *Vaccine* 2008;26(2):250-6.
- Cai HB, Ding XH, Zhou YF, Lie DM. Risk factors for cervical cancer in China: a case-control study. *Eur J Gynaecol Oncol* 2008;29(1):72-5.
- Cai HB, Ding XH, Chen CC. Prevalence of single and multiple human papillomavirus types in cervical cancer and precursor lesions in Hubei, China. *Oncology* 2009;76(3):157-61.
- Chan PK, Chang AR, Cheung JL, Chan DP, Xu LY, Tang NL, et al. Determinants of cervical human papillomavirus infection: differences between high- and low-oncogenic risk types. *J Infect Dis* 2002;185(1):28-35.
- Chan PK, Ho WC, Yu MY, Pong WM, Chan AC, Chan AK, et al. Distribution of human papillomavirus types in cervical cancers in Hong Kong: current situation and changes over the last decades. *Int J Cancer* 2009;125(7):1671-7.
- Chan PK, Chang AR, Yu MY, Li WH, Chan MY, Yeung AC, et al. Age distribution of human papillomavirus infection and cervical neoplasia reflects caveats of cervical screening policies. *Int J Cancer* 2010;126(1):297-301.
- Chan PK, Cheung TH, Li WH, Yu MY, Chan MY, Yim SF, et al. Attribution of human papillomavirus types to cervical intraepithelial neoplasia and invasive cancers in Southern China. *Int J Cancer* 2012;131(3):692-705.
- Chansaenroj J, Lurchachaiwong W, Termrungruanglert W, Tresukosol D, Niruthisard S, Trivijitsilp P, et al. Prevalence and genotypes of human papillomavirus among Thai women. *Asian Pac J Cancer Prev* 2010;11(1):117-22.
- Chansaenroj J, Junyangdikul P, Chinchai T, Swangvaree S, Karalak A, Gemma N, et al. Large scale study of HPV genotypes in cervical cancer and different cytological cervical specimens in Thailand. *J Med Virol* 2014;86(4):601-7.
- Chao A, Hsu KH, Lai CH, Huang HJ, Hsueh S, Lin SR, et al. Cervical cancer screening program integrating Pap smear and HPV DNA testing: a population-based study. *Int J Cancer* 2008;122(12):2835-41.
- Chao A, Chang CJ, Lai CH, Chao FY, Hsu YH, Chou HH, et al. Incidence and outcome of acquisition of human papillomavirus infection in women with normal cytology--a population-based cohort study from Taiwan. *Int J Cancer* 2010;126(1):191-8.
- Chao A, Jao MS, Huang CC, Huang HJ, Cheng HH, Yang JE, et al. Human papillomavirus genotype in cervical intraepithelial neoplasia grades 2 and 3 of Taiwanese women. *Int J Cancer* 2011;128(3):653-9.
- Chao A, Chen TC, Hsueh C, Huang CC, Yang JE, Hsueh S, et al. Human papillomavirus in vaginal intraepithelial neoplasia. *Int J Cancer* 2012;131(3):E259-68.

- Chen CA, Liu CY, Chou HH, Chou CY, Ho CM, Twu NF, et al. The distribution and differential risks of human papillomavirus genotypes in cervical preinvasive lesions: A Taiwan Cooperative Oncologic Group Study. *Int J Gynecol Cancer* 2006;16(5):1801-8.
- Chen HC, You SL, Hsieh CY, Schiffman M, Lin CY, Pan MH, et al. Prevalence of genotype-specific human papillomavirus infection and cervical neoplasia in Taiwan: a community-based survey of 10,602 women. *Int J Cancer* 2011;128(5):1192-203.
- Chen HC, Schiffman M, Lin CY, Pan MH, You SL, Chuang LC, et al. Persistence of type-specific human papillomavirus infection and increased long-term risk of cervical cancer. *J Natl Cancer Inst* 2011;103(18):1387-96.
- Chen Q, Xie LX, Qing ZR, Li LJ, Luo ZY, Lin M, et al. Epidemiologic characterization of human papillomavirus infection in rural Chaozhou, Eastern Guangdong province of China. *PLoS ONE* 2012;7(2):e32149.
- Chen Q, Luo ZY, Lin M, Lin QL, Chen CY, Yang C, et al. Prevalence and genotype distribution of human papillomavirus infections in women attending hospitals in Chaozhou of Guangdong province. *Asian Pac J Cancer Prev* 2012;13(4):1519-24.
- Chen W, Zhang X, Molijn A, Jenkins D, Shi JF, Quint W, et al. Human papillomavirus type-distribution in cervical cancer in China: the importance of HPV 16 and 18. *Cancer Causes Control* 2009;20(9):1705-13.
- Chen Z, Meng W, Du R, Zhu Y, Zhang Y, Ding Y. Genotype distribution and the relative risk factors for human papillomavirus in Urumqi, China. *Exp Ther Med* 2013;6(1):85-90.
- Chiang YC, Cheng WF, Chen YL, Chang MC, Hsieh CY, Lin MC, et al. High-risk human papillomavirus, other than type 16/18, in predominantly older Taiwanese women with high-grade cervical preinvasive lesions. *Taiwan J Obstet Gynecol* 2013;52(2):222-6.
- Chinchai T, Chansaenroj J, Swangvaree S, Junyangdikul P, Poovorawan Y. Prevalence of human papillomavirus genotypes in cervical cancer. *Int J Gynecol Cancer* 2012;22(6):1063-8.
- Cho NH, An HJ, Jeong JK, Kang S, Kim JW, Kim YT, et al. Genotyping of 22 human papillomavirus types by DNA chip in Korean women: comparison with cytologic diagnosis. *Am J Obstet Gynecol* 2003;188(1):56-62.
- Choi MC, Jung SG, Park H, Lee SY, Lee C, Hwang YY, et al. Photodynamic therapy for management of cervical intraepithelial neoplasia II and III in young patients and obstetric outcomes. *Lasers Surg Med* 2013;45(9):564-72.
- Chong PP, Asyikin N, Rusinahayati M, Halimatun S, Rozita R, Ng CK, et al. High prevalence of human papillomavirus DNA detected in cervical swabs from women in southern Selangor, Malaysia. *Asian Pac J Cancer Prev* 2010;11(6):1645-51.
- Chui SH, Szeto YT, Lam CW. Human papillomavirus infection in Macau women. *Public Health* 2012;126(7):600-4.
- Dai M, Bao YP, Li N, Clifford GM, Vaccarella S, Snijders PJ, et al. Human papillomavirus infection in Shanxi Province, People's Republic of China: a population-based study. *Br J Cancer* 2006;95(1):96-101.
- Datta P, Bhatla N, Dar L, Patro AR, Gulati A, Kriplani A, et al. Prevalence of human papillomavirus infection among young women in North India. *Cancer Epidemiol* 2010;34(2):157-61.



- Datta P, Bhatla N, Pandey RM, Dar L, Patro AR, Vasisht S, et al. Type-specific incidence and persistence of HPV infection among young women: a prospective study in North India. *Asian Pac J Cancer Prev* 2012;13(3):1019-24.
- Das D, Rai AK, Katakci AC, Barmon D, Deka P, Sharma JD, et al. Nested multiplex PCR based detection of human papillomavirus in cervical carcinoma patients of north- East India. *Asian Pac J Cancer Prev* 2013;14(2):785-90.
- Demir ET, Ceyhan M, Simsek M, Gunduz T, Arlier S, Aytac R, et al. The prevalence of different HPV types in Turkish women with a normal Pap smear. *J Med Virol* 2012;84(8):1242-7.
- Deodhar K, Gheit T, Vaccarella S, Romao CC, Tenet V, Nene BM, et al. Prevalence of human papillomavirus types in cervical lesions from women in rural Western India. *J Med Virol* 2012;84(7):1054-60.
- Ding DC, Hsu HC, Huang RL, Lai HC, Lin CY, Yu MH, et al. Type-specific distribution of HPV along the full spectrum of cervical carcinogenesis in Taiwan: an indication of viral oncogenic potential. *Eur J Obstet Gynecol Reprod Biol* 2008;140(2):245-51.
- Dondog B, Clifford GM, Vaccarella S, Waterboer T, Unurjargal D, Avirmed D, et al. Human papillomavirus infection in Ulaanbaatar, Mongolia: a population-based study. *Cancer Epidemiol Biomarkers Prev* 2008;17(7):1731-8.
- Dursun P, Senger SS, Arslan H, Kuscu E, Ayhan A. Human papillomavirus (HPV) prevalence and types among Turkish women at a gynecology outpatient unit. *BMC Infect Dis* 2009;9:191.
- Eghbali SS, Amirinejad R, Obeidi N, Mosadeghzadeh S, Vahdat K, Azizi F, et al. Oncogenic human papillomavirus genital infection in southern Iranian women: population-based study versus clinic-based data. *Virol J* 2012;9:194.
- Ekalaksananan T, Pientong C, Kotimanusvanij D, Kongyingyoes B, Sriamporn S, Jintakanon D. The relationship of human papillomavirus (HPV) detection to pap smear classification of cervical-scraped cells in asymptomatic women in northeast Thailand. *J Obstet Gynaecol Res* 2001;27(3):117-24.
- Ekalaksananan T, Pientong C, Thinkhamrop J, Kongyingyoes B, Evans MF, Chaiwongkot A. Cervical cancer screening in north east Thailand using the visual inspection with acetic acid (VIA) test and its relationship to high-risk human papillomavirus (HR-HPV) status. *J Obstet Gynaecol Res* 2010;36(5):1037-43.
- Eren F, Erenus M, Bas E, Ahiskali R, Yoldemir T. Prevalence of HPV infection by cytologic diagnosis and HPV DNA extraction and prevalence of the HPV genotypes detected in urban Turkish women. *Int J Gynaecol Obstet* 2010;109(3):235-8.
- Esmaeili M, Bonyadi M, Dastranj A, Alizadeh M, Melli MS, Shobeiri MJ. HPV typing in women with cervical precancerous and cancerous lesions in northwestern Iran. *Gynecol Obstet Invest* 2008;66(1):68-72.
- Ferdousi J, Nagai Y, Asato T, Hirakawa M, Inamine M, Kudaka W, et al. Impact of human papillomavirus genotype on response to treatment and survival in patients receiving radiotherapy for squamous cell carcinoma of the cervix. *Exp Ther Med* 2010;1(3):525-30.
- Franceschi S, Rajkumar T, Vaccarella S, Gajalakshmi V, Sharmila A, Snijders PJ, et al. Human papillomavirus and risk factors for cervical cancer in Chennai, India: a case-control study. *Int J Cancer* 2003;107(1):127-33.

- Franceschi S, Rajkumar R, Snijders PJ, Arslan A, Mahe C, Plummer M, et al. Papillomavirus infection in rural women in southern India. *Br J Cancer* 2005;92(3):601-6.
- Futai M, Watanabe J, Jobo T, Tsunoda S, Nishimura Y, Watanabe K, et al. Clinical significance of human papillomavirus genotype by linear array assay in Japanese women with uterine cervical lesions and type 16 physical status by in situ hybridization. *Int J Gynecol Cancer* 2009;19(8):1396-401.
- Gao YE, Zhang J, Wu J, Chen ZC, Yan XJ. Detection and genotyping of human papillomavirus DNA in cervical cancer tissues with fluorescence polarization. *Sheng Wu Hua Xue Yu Sheng Wu Wu Li Xue Bao (Shanghai)* 2003;35(11):1029-34.
- Garland SM, Brotherton JM, Condon JR, McIntyre PB, Stevens MP, Smith DW, et al. Human papillomavirus prevalence among indigenous and non-indigenous Australian women prior to a national HPV vaccination program. *BMC Med* 2011;9:104.
- Ghaffari SR, Sabokbar T, Mollahajian H, Dastan J, Ramezanzadeh F, Ensani F, et al. Prevalence of human papillomavirus genotypes in women with normal and abnormal cervical cytology in Iran. *Asian Pac J Cancer Prev* 2006;7(4):529-32.
- Gheit T, Vaccarella S, Schmitt M, Pawlita M, Franceschi S, Sankaranarayanan R, et al. Prevalence of human papillomavirus types in cervical and oral cancers in central India. *Vaccine* 2009;27(5):636-9.
- Guo J, Zhao F, Liu R, Mu Y. Prevalence and type distribution of human papillomavirus infection in women from Datong, China. *Scand J Infect Dis* 2010;42(1):72-5.
- Haghshenas M, Golini-Moghaddam T, Rafiee A, Emadeian O, Shykhpour A, Ashrafi GH. Prevalence and type distribution of high-risk human papillomavirus in patients with cervical cancer: a population-based study. *Infect Agent Cancer* 2013;8(1):20.
- Hajjaj AA, Senok AC, Al Mahmeed AE, Issa AA, Arzese AR, Botta GA. Human papillomavirus infection among women attending health facilities in the Kingdom of Bahrain. *Saudi Med J* 2006;27(4):487-91.
- Hamzi Abdul RS, Isa NM, Zailani HA, Omar B, Abdullah MF, Mohd Amin WA, et al. Distribution of HPV genotypes in cervical cancer in multi- ethnic Malaysia. *Asian Pac J Cancer Prev* 2014;15(2):651-6.
- Harima Y, Sawada S, Nagata K, Sougawa M, Ohnishi T. Human papilloma virus (HPV) DNA associated with prognosis of cervical cancer after radiotherapy. *Int J Radiat Oncol Biol Phys* 2002;52(5):1345-51.
- Hlaing T, Yip YC, Ngai KL, Vong HT, Wong SI, Ho WC, et al. Distribution of human papillomavirus genotypes among cervical intraepithelial neoplasia and invasive cancers in Macao. *J Med Virol* 2010;82(9):1600-5.
- Ho CM, Chien TY, Huang SH, Lee BH, Chang SF. Integrated human papillomavirus types 52 and 58 are infrequently found in cervical cancer, and high viral loads predict risk of cervical cancer. *Gynecol Oncol* 2006;102(1):54-60.
- Hong D, Ye F, Chen H, Lu W, Cheng Q, Hu Y, et al. Distribution of human papillomavirus genotypes in the patients with cervical carcinoma and its precursors in Zhejiang Province, China. *Int J Gynecol Cancer* 2008;18(1):104-9.
- Hou R, Xu C, Zhang S, Wu M, Zhang W. Distribution of human papillomavirus genotype and cervical neoplasia among women with abnormal cytology in Beijing, China. *Int J Gynaecol Obstet* 2012;119(3):257-61.

- Huang HJ, Huang SL, Lin CY, Lin RW, Chao FY, Chen MY, et al. Human papillomavirus genotyping by a polymerase chain reaction-based genechip method in cervical carcinoma treated with neoadjuvant chemotherapy plus radical surgery. *Int J Gynecol Cancer* 2004;14(4):639-49.
- Huang LW, Chao SL, Chen PH, Chou HP. Multiple HPV genotypes in cervical carcinomas: improved DNA detection and typing in archival tissues. *J Clin Virol* 2004;29(4):271-6.
- Huang LW, Hwang JL, Lin YH. Type-specific distribution of human papillomavirus in relation to grades of cervical neoplasia. *Int J Gynaecol Obstet* 2006;92(2):143-4.
- Huang Y-KY. Long-term outcomes of high-risk human papillomavirus infection support a long interval of cervical cancer screening. *British Journal of Cancer* 2008;98(5):863-9.
- Hwang HS, Park M, Lee SY, Kwon KH, Pang MG. Distribution and prevalence of human papillomavirus genotypes in routine pap smear of 2,470 Korean women determined by DNA chip. *Cancer Epidemiol Biomarkers Prev* 2004;13(12):2153-6.
- Hwang TS, Jeong JK, Park M, Han HS, Choi HK, Park TS. Detection and typing of HPV genotypes in various cervical lesions by HPV oligonucleotide microarray. *Gynecol Oncol* 2003;90(1):51-6.
- Inaba K, Nagasaka K, Kawana K, Arimoto T, Matsumoto Y, Tsuruga T, et al. High-risk human papillomavirus correlates with recurrence after laser ablation for treatment of patients with cervical intraepithelial neoplasia 3: A long-term follow-up retrospective study. *J Obstet Gynaecol Res* 2014;40(2):554-60.
- Inal MM, Kose S, Yildirim Y, Ozdemir Y, Toz E, Ertopcu K, et al. The relationship between human papillomavirus infection and cervical intraepithelial neoplasia in Turkish women. *Int J Gynecol Cancer* 2007;17(6):1266-70.
- Inoue M, Sakaguchi J, Sasagawa T, Tango M. The evaluation of human papillomavirus DNA testing in primary screening for cervical lesions in a large Japanese population. *Int J Gynecol Cancer* 2006;16(3):1007-13.
- Jeng CJ, Phdl, Ko ML, Ling QD, Shen J, Lin HW, et al. Prevalence of cervical human papillomavirus in Taiwanese women. *Clin Invest Med* 2005;28(5):261-6.
- Jin Q, Shen K, Li H, Zhou XR, Huang HF, Leng JH. Age-specific prevalence of human papillomavirus by grade of cervical cytology in Tibetan women. *Chin Med J (Engl)* 2010;123(15):2004-11.
- Kang WD, Kim CH, Cho MK, Kim JW, Kim YH, Choi HS, et al. Comparison of the hybrid capture II assay with the human papillomavirus DNA chip test for the detection of high-grade cervical lesions. *Int J Gynecol Cancer* 2009;19(5):924-8.
- Kang WD, Choi HS, Kim SM. Is vaccination with quadrivalent HPV vaccine after loop electrosurgical excision procedure effective in preventing recurrence in patients with high-grade cervical intraepithelial neoplasia (CIN2-3)? *Gynecol Oncol* 2013;130(2):264-8.
- Karunaratne K, Ihalagama H, Rohitha S, Moliijn A, Gopala K, Schmidt JE, et al. Human papillomavirus prevalence and type-distribution in women with cervical lesions: a cross-sectional study in Sri Lanka. *BMC Cancer* 2014;14:116.
- Khodakarami N, Clifford GM, Yavari P, Farzaneh F, Salehpour S, Broutet N, et al. Human papillomavirus infection in women with and without cervical cancer in Tehran, Iran. *Int J Cancer* 2012;131(2):E156-61.

- Khorasanizadeh F, Hassanloo J, Khaksar N, Mohammad TS, Marzaban M, Rashidi H, et al. Epidemiology of cervical cancer and human papilloma virus infection among Iranian women - analyses of national data and systematic review of the literature. *Gynecol Oncol* 2013;128(2):277-81.
- Kim CJ, Lee YS, Kwack HS, Yoon WS, Park TC, Park JS. Specific human papillomavirus types and other factors on the risk of cervical intraepithelial neoplasia: a case-control study in Korea. *Int J Gynecol Cancer* 2010;20(6):1067-73.
- Kim MA, Oh JK, Chay DB, Park DC, Kim SM, Kang ES, et al. Prevalence and seroprevalence of high-risk human papillomavirus infection. *Obstet Gynecol* 2010;116(4):932-40.
- Kim MJ, Kim JJ, Kim S. Type-specific prevalence of high-risk human papillomavirus by cervical cytology and age: Data from the health check-ups of 7,014 Korean women. *Obstet Gynecol Sci* 2013;56(2):110-20.
- Kim YJ, Kwon MJ, Woo HY, Paik SY. Prevalence of human papillomavirus infection and genotype distribution determined by the cyclic-catcher melting temperature analysis in Korean medical checkup population. *J Microbiol* 2013;51(5):665-70.
- Kondo K, Uenoyama A, Kitagawa R, Tsunoda H, Kusumoto-Matsuo R, Mori S, et al. Genotype distribution of human papillomaviruses in Japanese women with abnormal cervical cytology. *Open Virol J* 2012;6:277-83.
- Konno R, Tamura S, Dobbelaere K, Yoshikawa H. Prevalence and type distribution of human papillomavirus in healthy Japanese women aged 20 to 25 years old enrolled in a clinical study. *Cancer Sci* 2011;102(4):877-82.
- Lai CH, Huang HJ, Hsueh S, Chao A, Lin CT, Huang SL, et al. Human papillomavirus genotype in cervical cancer: a population-based study. *Int J Cancer* 2007;120(9):1999-2006.
- Lai CH, Chao A, Chang CJ, Huang CC, Wang LC, Hsueh S, et al. Age factor and implication of human papillomavirus type-specific prevalence in women with normal cervical cytology. *Epidemiol Infect* 2012;140(3):466-73.
- Laskov I, Grisaru D, Efrat G, Trejo LL, Grisaru G, Avidor B. Are the human papillomavirus genotypes different in cervical cancer and intraepithelial neoplasia in Jewish Israeli women, a low-risk population? *Int J Gynecol Cancer* 2013;23(4):730-4.
- Lee EH, Um TH, Chi HS, Hong YJ, Cha YJ. Prevalence and distribution of human papillomavirus infection in Korean women as determined by restriction fragment mass polymorphism assay. *J Korean Med Sci* 2012;27(9):1091-7.
- Lee GY, Kim SM, Rim SY, Choi HS, Park CS, Nam JH. Human papillomavirus (HPV) genotyping by HPV DNA chip in cervical cancer and precancerous lesions. *Int J Gynecol Cancer* 2005;15(1):81-7.
- Lee HS, Kim KM, Kim SM, Choi YD, Nam JH, Park CS, et al. Human papillomavirus genotyping using HPV DNA chip analysis in Korean women. *Int J Gynecol Cancer* 2007;17(2):497-501.
- Lee K-O, Jeong S-J, Park M-Y, Seong H-S, Shin E-S, Choi K-H, et al. Prevalence of human papillomavirus genotypes in routine pap smear of 2,562 Korean women determined by PCR-DNA sequencing. *Journal of Bacteriology and Virology* 2009;39(4):337-44.
- Lee SA, Kang D, Seo SS, Jeong JK, Yoo KY, Jeon YT, et al. Multiple HPV infection in cervical cancer screened by HPVDNAChip. *Cancer Lett* 2003;198(2):187-92.

- Lee YS, Gong G, Sohn JH, Ryu KS, Lee JH, Khang SK, et al. Cytological Evaluation and REBA HPV-ID HPV Testing of Newly Developed Liquid-Based Cytology, EASYPREP: Comparison with SurePath. *Korean J Pathol* 2013;47(3):265-74.
- Li C, Wu M, Wang J, Zhang S, Zhu L, Pan J, et al. A population-based study on the risks of cervical lesion and human papillomavirus infection among women in Beijing, People's Republic of China. *Cancer Epidemiol Biomarkers Prev* 2010;19(10):2655-64.
- Li H, Zhang J, Chen Z, Zhou B, Tan Y. Prevalence of human papillomavirus genotypes among women in Hunan province, China. *Eur J Obstet Gynecol Reprod Biol* 2013;170(1):202-5.
- Li J, Xie L, Gan X, Liu B, Zhang Y, Song B, et al. Association of inhibitor of differentiation 1 expression with human papillomaviruses infections in cervical carcinoma. *Int J Gynecol Cancer* 2011;21(7):1276-81.
- Li J, Zhang D, Zhang Y, Wang X, Lin Y, Hu L. Prevalence and genotype distribution of human papillomavirus in women with cervical cancer or high-grade precancerous lesions in Chengdu, western China. *Int J Gynaecol Obstet* 2011;112(2):131-4.
- Li J, Mei J, Wang X, Hu L, Lin Y, Yang P. Human papillomavirus type-specific prevalence in women with cervical intraepithelial neoplasm in Western China. *J Clin Microbiol* 2012;50(3):1079-81.
- Li LK, Dai M, Clifford GM, Yao WQ, Arslan A, Li N, et al. Human papillomavirus infection in Shenyang City, People's Republic of China: A population-based study. *Br J Cancer* 2006;95(11):1593-7.
- Li Y, Wang Y, Jia C, Ma Y, Lan Y, Wang S. Detection of human papillomavirus genotypes with liquid bead microarray in cervical lesions of northern Chinese patients. *Cancer Genet Cytogenet* 2008;182(1):12-7.
- Lin H, Ma YY, Moh JS, Ou YC, Shen SY, ChangChien CC. High prevalence of genital human papillomavirus type 52 and 58 infection in women attending gynecologic practitioners in South Taiwan. *Gynecol Oncol* 2006;101(1):40-5.
- Lin M, Yang LY, Li LJ, Wu JR, Peng YP, Luo ZY. Genital human papillomavirus screening by gene chip in Chinese women of Guangdong province. *Aust N Z J Obstet Gynaecol* 2008;48(2):189-94.
- Liu HY, Zhou SL, Ku JW, Zhang DY, Li B, Han XN, et al. Prevalence of human papillomavirus infection in esophageal and cervical cancers in the high incidence area for the two diseases from 2007 to 2009 in Linzhou of Henan Province, Northern China. *Arch Virol* 2014;159(6):1393-401.
- Liu J, Rose B, Huang X, Liao G, Carter J, Wu X, et al. Comparative analysis of characteristics of women with cervical cancer in high- versus low-incidence regions. *Gynecol Oncol* 2004;94(3):803-10.
- Liu SS, Tsang PC, Chan KY, Cheung AN, Chan KK, Leung RC, et al. Distribution of six oncogenic types of human papillomavirus and type 16 integration analysis in Chinese women with cervical precancerous lesions and carcinomas. *Tumour Biol* 2008;29(2):105-13.
- Liu SS, Chan KY, Leung RC, Chan KK, Tam KF, Luk MH, et al. Prevalence and risk factors of Human Papillomavirus (HPV) infection in southern Chinese women - a population-based study. *PLoS ONE* 2011;6(5):e19244.
- Liu W, Wu EQ, Yu XH, Feng LH, Jiang CL, Zha X, et al. Detection of human papillomavirus genotypes associated with mucopurulent cervicitis and cervical cancer in Changchun, China. *Int J Gynaecol Obstet* 2013;120(2):124-6.

- Liu X, Zhang S, Ruan Q, Ji Y, Ma L, Zhang Y. Prevalence and type distribution of human papillomavirus in women with cervical lesions in Liaoning Province, China. *Int J Gynecol Cancer* 2010;20(1):147-53.
- Lo KWK. Clinical and prognostic significance of human papillomavirus in a Chinese population of cervical cancers. *Gynecol Obstet Invest* 2001;51(3):202-10.
- Lo KW, Wong YF, Chan MK, Poon JS, Wang VW, Zhu SN, et al. Prevalence of human papillomavirus in cervical cancer: A multicenter study in China. *Int J Cancer* 2002;100(3):327-31.
- Maehama T, Asato T, Kanazawa K. Prevalence of HPV infection in cervical cytology-normal women in Okinawa, Japan, as determined by a polymerase chain reaction. *Int J Gynaecol Obstet* 2000;69(2):175-6.
- Maehama T, Asato T, Kanazawa K. Prevalence of human papillomavirus in cervical swabs in the Okinawa Islands, Japan. *Arch Gynecol Obstet* 2002;267(2):64-6.
- Maehama T. Epidemiological study in Okinawa, Japan, of human papillomavirus infection of the uterine cervix. *Infect Dis Obstet Gynecol* 2005;13(2):77-80.
- Masumoto N, Fujii T, Ishikawa M, Mukai M, Ono A, Iwata T, et al. Dominant human papillomavirus 16 infection in cervical neoplasia in young Japanese women; study of 881 outpatients. *Gynecol Oncol* 2004;94(2):509-14.
- Matsukura T, Sugase M. Relationships between 80 human papillomavirus genotypes and different grades of cervical intraepithelial neoplasia: association and causality. *Virology* 2001;283(1):139-47.
- Matsumoto K, Oki A, Furuta R, Maeda H, Yasugi T, Takatsuka N, et al. Predicting the progression of cervical precursor lesions by human papillomavirus genotyping: a prospective cohort study. *Int J Cancer* 2011;128(12):2898-910.
- Miura S, Matsumoto K, Oki A, Satoh T, Tsunoda H, Yasugi T, et al. Do we need a different strategy for HPV screening and vaccination in East Asia? *Int J Cancer* 2006;119(11):2713-5.
- Mortazavi S, Zali M, Raoufi M, Nadji M, Kowsarian P, Nowroozi A. The Prevalence of Human Papillomavirus in Cervical Cancer in Iran. *Asian Pac J Cancer Prev* 2002;3(1):69-72.
- Nagai Y, Maehama T, Asato T, Kanazawa K. Detection of human papillomavirus DNA in primary and metastatic lesions of carcinoma of the cervix in women from Okinawa, Japan. *Am J Clin Oncol* 2001;24(2):160-6.
- Nagai Y, Maehama T, Asato T, Kanazawa K. Persistence of human papillomavirus infection after therapeutic conization for CIN 3: is it an alarm for disease recurrence? *Gynecol Oncol* 2000;79(2):294-9.
- Ngamkham J, Homcha-Aim P, Boonmark K, Phansri T, Swangvaree SS. Preliminary Study on Human Papillomavirus Frequency and Specific Type-distribution in Vulva Cancer from Thai Women. *Asian Pac J Cancer Prev* 2013;14(4):2355-9.
- Nishiwaki M, Yamamoto T, Tone S, Murai T, Ohkawara T, Matsunami T, et al. Genotyping of human papillomaviruses by a novel one-step typing method with multiplex PCR and clinical applications. *J Clin Microbiol* 2008;46(4):1161-8.
- Oh YL, Shin KJ, Han J, Kim DS. Significance of high-risk human papillomavirus detection by polymerase chain reaction in primary cervical cancer screening. *Cytopathology* 2001;12:75-83.

- Oh JK, Ju YH, Franceschi S, Quint W, Shin HR. Acquisition of new infection and clearance of type-specific human papillomavirus infections in female students in Busan, South Korea: a follow-up study. *BMC Infect Dis* 2008;8:13.
- Oh JK, Franceschi S, Kim BK, Kim JY, Ju YH, Hong EK, et al. Prevalence of human papillomavirus and Chlamydia trachomatis infection among women attending cervical cancer screening in the Republic of Korea. *Eur J Cancer Prev* 2009;18(1):56-61.
- Oh JK, Alemany L, Suh JI, Rha SH, Munoz N, Bosch FX, et al. Type-specific human papillomavirus distribution in invasive cervical cancer in Korea, 1958-2004. *Asian Pac J Cancer Prev* 2010;11(4):993-1000.
- Okadome M, Saito T, Tanaka H, Nogawa T, Furuta R, Watanabe K, et al. Potential impact of combined high- and low-risk human papillomavirus infection on the progression of cervical intraepithelial neoplasia 2. *J Obstet Gynaecol Res* 2014;40(2):561-9.
- Onuki M, Matsumoto K, Satoh T, Oki A, Okada S, Minaguchi T, et al. Human papillomavirus infections among Japanese women: age-related prevalence and type-specific risk for cervical cancer. *Cancer Sci* 2009;100(7):1312-6.
- Osakabe M, Hayashi M, Katayama Y, Emura I, Nemoto K, Umezu H, et al. Characteristics of vulvar squamous cell carcinoma in Japanese women. *Pathol Int* 2007;57(6):322-7.
- Othman N, Othman NH. Detection of human papillomavirus DNA in routine cervical scraping samples: use for a national cervical cancer screening program in a developing nation. *Asian Pac J Cancer Prev* 2014;15(5):2245-9.
- Ozalp SS, Us T, Arslan E, Oge T, Kasifoglu N. HPV DNA and Pap smear test results in cases with and without cervical pathology. *J Turkish-German Gynecol Assoc* 2012;13(1):8-14.
- Park EK, Cho H, Lee SH, Lee SG, Lee SY, Kim KH, et al. Human Papillomavirus Prevalence and Genotype Distribution among HIV-Infected Women in Korea. *J Korean Med Sci* 2014;29(1):32-7.
- Park JS, Kim YT, Lee A, Lee Y, Kim KT, Cho CH, et al. Prevalence and type distribution of human papillomavirus in cervical adenocarcinoma in Korean women. *Gynecol Oncol* 2013;130(1):115-20.
- Park TC, Kim CJ, Koh YM, Lee KH, Yoon JH, Kim JH, et al. Human Papillomavirus Genotyping by the DNA Chip in the Cervical Neoplasia. *DNA and Cell Biology* 2004;23(2):119-25.
- Peedicayil A, Abraham P, Sathish N, John S, Shah K, Sridharan G, et al. Human papillomavirus genotypes associated with cervical neoplasia in India. *Int J Gynecol Cancer* 2006;16(4):1591-5.
- Pham TH, Nguyen TH, Herrero R, Vaccarella S, Smith JS, Nguyen Thuy TT, et al. Human papillomavirus infection among women in South and North Vietnam. *Int J Cancer* 2003;104(2):213-20.
- Phongsavan K, Gustavsson I, Marions L, Phengsavanh A, Wahlstrom R, Gyllensten U. Detection of human papillomavirus among women in Laos: feasibility of using filter paper card and prevalence of high-risk types. *Int J Gynecol Cancer* 2012;22(8):1398-406.
- Pillai RM, Babu JM, Jissa VT, Lakshmi S, Chiplunkar SV, Patkar M, et al. Region-wise distribution of high-risk human papillomavirus types in squamous cell carcinomas of the cervix in India. *Int J Gynecol Cancer* 2010;20(6):1046-51.

- Qiu AD, Wu EQ, Yu XH, Jiang CL, Jin YH, Wu YG, et al. HPV prevalence, E6 sequence variation and physical state of HPV16 isolates from patients with cervical cancer in Sichuan, China. *Gynecol Oncol* 2007;104(1):77-85.
- Quek SC, Lim BK, Domingo E, Soon R, Park JS, Vu TN, et al. Human papillomavirus type distribution in invasive cervical cancer and high-grade cervical intraepithelial neoplasia across 5 countries in Asia. *Int J Gynecol Cancer* 2013;23(1):148-56.
- Rachmadi L, Jordanova ES, Kolkman-Uljee S, van dL-N, I, Purwoto G, Siregar B, et al. Cytomorphological analysis of uterine cervical pap smears in relation to human papillomavirus infection in Indonesian women. *Acta Cytol* 2012;56(2):171-6.
- Raza SA, Franceschi S, Pallardy S, Malik FR, Avan BI, Zafar A, et al. Human papillomavirus infection in women with and without cervical cancer in Karachi, Pakistan. *Br J Cancer* 2010;102(11):1657-60.
- Rumbold AR, Tan SE, Condon JR, Taylor-Thomson D, Nickels M, Tabrizi SN, et al. Investigating a cluster of vulvar cancer in young women: a cross-sectional study of genital human papillomavirus prevalence. *BMC Infect Dis* 2012;12:243.
- Sahiner F, Kubar A, Yapar M, Sener K, Dede M, Gumral R. Detection of major HPVs by a new multiplex real-time PCR assay using type-specific primers. *J Microbiol Methods* 2014;97:44-50.
- Saito J, Hoshiai H, Noda K. Type of human papillomavirus and expression of p53 in elderly women with cervical cancer. *Gynecol Obstet Invest* 2000;49(3):190-3.
- Samarawickrema NA, Tabrizi SN, Hewavisenthi J, Leong T, Garland SM. Distribution of human papillomavirus genotypes in archival cervical tissue from women with cervical cancer in urban Sri Lanka. *Int J Gynaecol Obstet* 2011;115(2):180-2.
- Sasagawa T, Basha W, Yamazaki H, Inoue M. High-risk and multiple human papillomavirus infections associated with cervical abnormalities in Japanese women. *Cancer Epidemiol Biomarkers Prev* 2001;10(1):45-52.
- Satoh T, Matsumoto K, Fujii T, Sato O, Gemma N, Onuki M, et al. Rapid genotyping of carcinogenic human papillomavirus by loop-mediated isothermal amplification using a new automated DNA test (Clinichip HPV). *J Virol Methods* 2013;188(1-2):83-93.
- Sayyed DR, Song KS, Nimse SB, An H, Kim J, Kim T. HPV genotyping 9G membrane test. *Viruses* 2013;5(11):2840-55.
- Schellekens MC, Dijkman A, Aziz MF, Siregar B, Cornain S, Kolkman-Uljee S, et al. Prevalence of single and multiple HPV types in cervical carcinomas in Jakarta, Indonesia. *Gynecol Oncol* 2004;93(1):49-53.
- Settheetham-Ishida W, Kanjanavirojkul N, Kularbkaew C, Ishida T. Human papillomavirus genotypes and the p53 codon 72 polymorphism in cervical cancer of Northeastern Thailand. *Microbiol Immunol* 2005;49(5):417-21.
- Settheetham-Ishida W, Yuenyao P, Tassaneeyakul W, Kanjanavirojkul N, Thawmor A, Kularbkaew C, et al. Selected risk factors, human papillomavirus infection and the p53 codon 72 polymorphism in patients with squamous intraepithelial lesions in northeastern Thailand. *Asian Pac J Cancer Prev* 2006;7(1):113-8.



- Shah W, Hongwei C, Jin Z, Lifang D, Jun Y, Yili W. The prevalence of human papillomavirus type 58 in Chinese patients with cervical carcinoma and its influence on survival. *Clin Oncol (R Coll Radiol)* 2009;21(10):768-74.
- Shahsiah R, Khademalhosseini M, Mehrdad N, Ramezani F, Nadji SA. Human papillomavirus genotypes in Iranian patients with cervical cancer. *Pathol Res Pract* 2011;207(12):754-7.
- Shen Y, Gong JM, Li YQ, Gong YM, Lei DM, Cheng GM, et al. Epidemiology and genotype distribution of human papillomavirus (HPV) in women of Henan Province, China. *Clin Chim Acta* 2013;415:297-301.
- Sherpa AT, Clifford GM, Vaccarella S, Shrestha S, Nygard M, Karki BS, et al. Human papillomavirus infection in women with and without cervical cancer in Nepal. *Cancer Causes Control* 2010;21(3):323-30.
- Shin HR, Lee DH, Herrero R, Smith JS, Vaccarella S, Hong SH, et al. Prevalence of human papillomavirus infection in women in Busan, South Korea. *Int J Cancer* 2003;103(3):413-21.
- Shin HR, Franceschi S, Vaccarella S, Roh JW, Ju YH, Oh JK, et al. Prevalence and determinants of genital infection with papillomavirus, in female and male university students in Busan, South Korea. *J Infect Dis* 2004;190(3):468-76.
- Simonella LM, Lewis H, Smith M, Neal H, Bromhead C, Canfell K. Type-specific oncogenic human papillomavirus infection in high grade cervical disease in New Zealand. *BMC Infect Dis* 2013;13:114.
- Singh A, Datta P, Jain SK, Bhatla N, Dutta GS, Dey B, et al. Human papilloma virus genotyping, variants and viral load in tumors, squamous intraepithelial lesions, and controls in a north Indian population subset. *Int J Gynecol Cancer* 2009;19(9):1642-8.
- Siriaunkgul S, Suwivat S, Settakorn J, Khunamornpong S, Tungsinmunkong K, Boonthum A, et al. HPV genotyping in cervical cancer in Northern Thailand: adapting the linear array HPV assay for use on paraffin-embedded tissue. *Gynecol Oncol* 2008;108(3):555-60.
- Siriaunkgul S, Utaipat U, Settakorn J, Sukpan K, Srisomboon J, Khunamornpong S. HPV genotyping in neuroendocrine carcinoma of the uterine cervix in northern Thailand. *Int J Gynaecol Obstet* 2011;115(2):175-9.
- Siriaunkgul S, Utaipat U, Suthipintawong C, Tungsinmunkong K, Triratanachat S, Khunamornpong S. HPV genotyping in adenocarcinoma of the uterine cervix in Thailand. *Int J Gynaecol Obstet* 2013;123(3):226-30.
- Sowjanya AP, Jain M, Poli UR, Padma S, Das M, Shah KV, et al. Prevalence and distribution of high-risk human papilloma virus (HPV) types in invasive squamous cell carcinoma of the cervix and in normal women in Andhra Pradesh, India. *BMC Infect Dis* 2005;5:116.
- Srivastava S, Gupta S, Roy JK. High prevalence of oncogenic HPV-16 in cervical smears of asymptomatic women of eastern Uttar Pradesh, India: a population-based study. *J Biosci* 2012;37(1):63-72.
- Stevens MP, Tabrizi SN, Quinn MA, Garland SM. Human papillomavirus genotype prevalence in cervical biopsies from women diagnosed with cervical intraepithelial neoplasia or cervical cancer in Melbourne, Australia. *Int J Gynecol Cancer* 2006;16(3):1017-24.

- Stevens MP, Garland SM, Tan JH, Quinn MA, Petersen RW, Tabrizi SN. HPV genotype prevalence in women with abnormal pap smears in Melbourne, Australia. *J Med Virol* 2009;81(7):1283-91.
- Sukasem C, Pairoj W, Saekang N, Pombubpha H, Srichunrasami C, Pongtippan A, et al. Molecular epidemiology of human papillomavirus genotype in women with high-grade squamous intraepithelial lesion and cervical cancer: will a quadrivalent vaccine be necessary in Thailand? *J Med Virol* 2011;83(1):119-26.
- Sukvirach S, Smith JS, Tunsakul S, Munoz N, Kesararat V, Opasatian O, et al. Population-based human papillomavirus prevalence in Lampang and Songkla, Thailand. *J Infect Dis* 2003;187(8):1246-56.
- Sun B, He J, Chen X, He M, He Z, Wang Y, et al. Prevalence and genotype distribution of human papillomavirus infection in Harbin, Northeast China. *Arch Virol* 2014;159(5):1027-32.
- Sun LL, Jin Q, Li H, Zhou XR, Song ZQ, Cheng XM, et al. Population-based study on the prevalence of and risk factors for human papillomavirus infection in Qujing of Yunnan province, Southwest China. *Virol J* 2012;9:153.
- Suthipintawong C, Siriaunkgul S, Tungsinmunkong K, Pientong C, Ekalaksananan T, Karalak A, et al. Human papilloma virus prevalence, genotype distribution, and pattern of infection in Thai women. *Asian Pac J Cancer Prev* 2011;12(4):853-6.
- Suwannarurk K, Tapanadechopol P, Pattaraarchachai J, Bhamarapavati S. Hospital-based prevalence and sensitivity of high-risk human papillomavirus in Thai urban population. *Cancer Epidemiol* 2009;33(1):56-60.
- Swangvaree SS, Kongkaew P, Ngamkham J. Frequency and Type-distribution of Human Papillomavirus from Paraffin-embedded Blocks of High Grade Cervical Intraepithelial Neoplasia Lesions in Thailand. *Asian Pac J Cancer Prev* 2013;14(2):1023-6.
- Tabone T, Garland SM, Mola G, O'Connor M, Danielewski J, Tabrizi SN. Prevalence of human papillomavirus genotypes in women with cervical cancer in Papua New Guinea. *Int J Gynaecol Obstet* 2012;117(1):30-2.
- Tabrizi SN, Law I, Buadromo E, Stevens MP, Fong J, Samuela J, et al. Human papillomavirus genotype prevalence in cervical biopsies from women diagnosed with cervical intraepithelial neoplasia or cervical cancer in Fiji. *Sex Health* 2011;8(3):338-42.
- Takehara K, Toda T, Nishimura T, Sakane J, Kawakami Y, Mizunoe T, et al. Human papillomavirus types 52 and 58 are prevalent in uterine cervical squamous lesions from Japanese women. *Patholog Res Int* 2011;2011:246936.
- Tan SE, Garland SM, Rumbold AR, Zardawi I, Taylor-Thomson D, Condon JR, et al. Investigating a cluster of vulvar cancers in young women: distribution of human papillomavirus and HPV-16 variants in vulvar dysplastic or neoplastic biopsies. *Sex Health* 2013;10(1):18-25.
- Tay SK, Oon LL. Prevalence of cervical human papillomavirus infection in healthy women is related to sexual behaviours and educational level: a cross-sectional study. *Int J STD AIDS* 2014;25(14):1013-21.
- Thomas DB, Ray RM, Koetsawang A, Kiviat N, Kuypers J, Qin Q, et al. Human papillomaviruses and cervical cancer in Bangkok. I. Risk factors for invasive cervical carcinomas with human papillomavirus types 16 and 18 DNA. *Am J Epidemiol* 2001;153(8):723-31.

- Tong SY, Lee YS, Park JS, Namkoong SE. Human papillomavirus genotype as a prognostic factor in carcinoma of the uterine cervix. *Int J Gynecol Cancer* 2007;17(6):1307-13.
- Tsao KC, Huang CG, Kuo YB, Chang TC, Sun CF, Chang CA, et al. Prevalence of human papillomavirus genotypes in northern Taiwanese women. *J Med Virol* 2010;82(10):1739-45.
- Tsuda H, Hashiguchi Y, Nishimura S, Kawamura N, Inoue T, Yamamoto K. Relationship between HPV typing and abnormality of G1 cell cycle regulators in cervical neoplasm. *Gynecol Oncol* 2003;91(3):476-85.
- Twu NF, Yen MS, Lau HY, Chen YJ, Yu BK, Lin CY. Type-specific human papillomavirus DNA testing with the genotyping array: a comparison of cervical and vaginal sampling. *Eur J Obstet Gynecol Reprod Biol* 2011;156(1):96-100.
- Usubutun A, Alemany L, Kucukali T, Ayhan A, Yuce K, de Sanjose S, et al. Human papillomavirus types in invasive cervical cancer specimens from Turkey. *Int J Gynecol Pathol* 2009;28(6):541-8.
- Vet JN, de Boer MA, van den Akker BE, Siregar B, Lisnawati, Budiningsih S, et al. Prevalence of human papillomavirus in Indonesia: a population-based study in three regions. *Br J Cancer* 2008;99(1):214-8.
- Vu L, Le H, Luong O, Tran H, Nguyen N, Luu H. Prevalence of cervical human papillomavirus infection among married women in hanoi, Vietnam, 2010. *Asia Pac J Public Health* 2012;24(2):385-90.
- Vu LT, Le HT. Cervical human papilloma virus infection among the general female population in Vietnam: a situation analysis. *Asian Pac J Cancer Prev* 2011;12(2):561-6.
- Vu LT, Bui D, Le HT. Prevalence of cervical infection with HPV type 16 and 18 in Vietnam: implications for vaccine campaign. *BMC Cancer* 2013;13:53.
- Wang CH, Garvilles RG, Chen CY. Characterization of human papillomavirus infection in north Taiwan. *J Med Virol* 2010;82(8):1416-23.
- Watari H, Michimata R, Yasuda M, Ishizu A, Tomaru U, Xiong Y, et al. High prevalence of multiple human papillomavirus infection in Japanese patients with invasive uterine cervical cancer. *Pathobiology* 2011;78(4):220-6.
- Wentzensen N, Wilson LE, Wheeler CM, Carreon JD, Gravitt PE, Schiffman M, et al. Hierarchical clustering of human papilloma virus genotype patterns in the ASCUS-LSIL triage study. *Cancer Res* 2010;70(21):8578-86.
- Williamson D, Nagappan R, Sirikonda R, Rahnema F, Thomas S, Lovell-Smith M, et al. Distribution of HPV genotypes in women with cervical cancer in Auckland, New Zealand; a review of 50 specimens between 2000-2006. *Aust N Z J Obstet Gynaecol* 2011;51(1):67-70.
- Wu D, Cai L, Huang M, Zheng Y, Yu J. Prevalence of genital human papillomavirus infection and genotypes among women from Fujian province, PR China. *Eur J Obstet Gynecol Reprod Biol* 2010;151(1):86-90.
- Wu D, Zheng Y, Chen W, Guo C, Yu J, Chen G, et al. Prediction of residual/recurrent disease by HPV genotype after loop excision procedure for high-grade cervical intraepithelial neoplasia with negative margins. *Aust N Z J Obstet Gynaecol* 2011;51(2):114-8.
- Wu EQ, Zhang GN, Yu XH, Ren Y, Fan Y, Wu YG, et al. Evaluation of high-risk human papillomaviruses type distribution in cervical cancer in Sichuan province of China. *BMC Cancer* 2008;8:202.

- Wu EQ, Yu XH, Zha X, Zhang GN, Wang JH, Fan Y, et al. Distribution of human papillomavirus genotypes in archival cervical lesions in eastern inner Mongolian autonomous region, China. *Int J Gynecol Cancer* 2009;19(5):919-23.
- Wu EQ, Liu B, Cui JF, Chen W, Wang JB, Lu L, et al. Prevalence of type-specific human papillomavirus and pap results in Chinese women: a multi-center, population-based cross-sectional study. *Cancer Causes Control* 2013;24(4):795-803.
- Wu RF, Dai M, Qiao YL, Clifford GM, Liu ZH, Arslan A, et al. Human papillomavirus infection in women in Shenzhen City, People's Republic of China, a population typical of recent Chinese urbanisation. *Int J Cancer* 2007;121(6):1306-11.
- Wu X, Zhang C, Feng S, Liu C, Li Y, Yang Y, et al. Detection of HPV types and neutralizing antibodies in Gansu province, China. *J Med Virol* 2009;81(4):693-702.
- Wu Y, Zhang Q, Liu B, Yu G. The analysis of the entire HLA, partial non-HLA and HPV for Chinese women with cervical cancer. *J Med Virol* 2008;80(10):1808-13.
- Ye J, Cheng X, Chen X, Ye F, Lu W, Xie X. Prevalence and risk profile of cervical Human papillomavirus infection in Zhejiang Province, southeast China: a population-based study. *Virol J* 2010;7:66.
- Yip YC, Ngai KL, Vong HT, Tzang LC, Ji S, Yang M, et al. Prevalence and genotype distribution of cervical human papillomavirus infection in Macao. *J Med Virol* 2010;82(10):1724-9.
- Yousefzadeh A, Mostafavizadeh SM, Jarollahi A, Raeisi M, Garshasbi M, Siavashvahi Z, et al. Human papillomavirus (HPV) prevalence and types among women attending regular gynecological visit in Tehran, Iran. *Clin Lab* 2014;60(2):267-73.
- Yousuf S, Syed S, Moazzam A, Lucky MH. Frequency of high risk human papillomavirus types in squamous cell carcinoma of cervix among women. *J Pak Med Assoc* 2010;60(3):193-6.
- Yu XW, Zhang XW, Wang L, Li F, Xu J. Status of human papillomavirus infection in the rural female population in Northwestern China: an observational study. *J Low Genit Tract Dis* 2013;17(1):17-22.
- Yuan X, Yang Y, Gu D, Liu H, Yang H, Wang M. Prevalence of human papillomavirus infection among women with and without normal cervical histology in Shandong Province, China. *Arch Gynecol Obstet* 2011;283(6):1385-9.
- Yuce K, Pinar A, Salman MC, Alp A, Sayal B, Dogan S, et al. Detection and genotyping of cervical HPV with simultaneous cervical cytology in Turkish women: a hospital-based study. *Arch Gynecol Obstet* 2012;286(1):203-8.
- Zandi K, Eghbali SS, Hamkar R, Ahmadi S, Ramedani E, Deilami I, et al. Prevalence of various human papillomavirus (HPV) genotypes among women who subjected to routine Pap smear test in Bushehr city (south west of Iran) 2008-2009. *Virol J* 2010;7:65.
- Zhang L, Wang Y, Peng M, She Q, Xiang Q, Chen Q, et al. Prevalence and type distribution of high-risk human papillomavirus infections among women in Wufeng County, China. *Arch Gynecol Obstet* 2012;286(3):695-9.
- Zhang R, Shi TY, Ren Y, Lu H, Wei ZH, Hou WJ, et al. Risk factors for human papillomavirus infection in Shanghai suburbs: a population-based study with 10,000 women. *J Clin Virol* 2013;58(1):144-8.

- Zhang R, Velicer C, Chen W, Liaw KL, Wu EQ, Liu B, et al. Human papillomavirus genotype distribution in cervical intraepithelial neoplasia grades 1 or worse among 4215 Chinese women in a population-based study. *Cancer Epidemiol* 2013;37(6):939-45.
- Zhao FH, Jeronimo J, Qiao YL, Schweizer J, Chen W, Valdez M, et al. An evaluation of novel, lower-cost molecular screening tests for human papillomavirus in rural China. *Cancer Prev Res (Phila)* 2013;6(9):938-48.
- Zhao FH, Zhu FC, Chen W, Li J, Hu YM, Hong Y, et al. Baseline prevalence and type distribution of human papillomavirus in healthy Chinese women aged 18-25 years enrolled in a clinical trial. *Int J Cancer* 2014;135(11):2604-11.
- Zhao R, Zhang WY, Wu MH, Zhang SW, Pan J, Zhu L, et al. Human papillomavirus infection in Beijing, People's Republic of China: a population-based study. *Br J Cancer* 2009;101(9):1635-40.
- Zhao Y, Lin H, Shen D, Xuan Y, Lin Z. Distribution of HPV genotypes in uterine cervical lesions in Yanbian, northern China. *Pathol Int* 2008;58(10):643-7.

### **1.3 Europe**

- Agarossi A, Ferrazzi E, Parazzini F, Perno CF, Ghisoni L. Prevalence and type distribution of high-risk human papillomavirus infection in women undergoing voluntary cervical cancer screening in Italy. *J Med Virol* 2009;81(3):529-35.
- Agodi A, Barchitta M, La Rosa N, Cipresso R, Guarnaccia M, Caruso M, et al. Human papillomavirus infection: low-risk and high-risk genotypes in women in Catania, Sicily. *Int J Gynecol Cancer* 2009;19(6):1094-8.
- Agorastos T, Lambropoulos AF, Sotiriadis A, Mikos T, Togaridou E, Emmanouilides CJ. Prevalence and distribution of high-risk human papillomavirus in Greece. *Eur J Cancer Prev* 2009;18(6):504-9.
- Aleman L, Perez C, Tous S, Llombart-Bosch A, Lloveras B, Lerma E, et al. Human papillomavirus genotype distribution in cervical cancer cases in Spain. Implications for prevention. *Gynecol Oncol* 2012;124(3):512-7.
- Alonso I, Felix A, Torne A, Fuste V, Del PM, Castillo P, et al. Human papillomavirus as a favorable prognostic biomarker in squamous cell carcinomas of the vagina. *Gynecol Oncol* 2012;125(1):194-9.
- Ambrosio MR, Onorati M, Rocca BJ, Santopietro R. Vulvar cancer and HPV infection: analysis of 22 cases. *Pathologica* 2008;100(5):405-7.
- Ammatuna P, Giovannelli L, Matranga D, Ciriminna S, Perino A. Prevalence of genital human papilloma virus infection and genotypes among young women in Sicily, South Italy. *Cancer Epidemiol Biomarkers Prev* 2008;17(8):2002-6.
- Anderson L, O'Rorke M, Jamison J, Wilson R, Gavin A. Prevalence of human papillomavirus in women attending cervical screening in the UK and Ireland: new data from northern Ireland and a systematic review and meta-analysis. *J Med Virol* 2013;85(2):295-308.
- Andersson S, Larson B, Hjerpe A, Silfversward C, Sallstrom J, Wilander E, et al. Adenocarcinoma of the uterine cervix: the presence of human papillomavirus and the method of detection. *Acta Obstet Gynecol Scand* 2003;82(10):960-5.

- Andersson S, Rylander E, Larson B, Sigurdardottir S, Backlund I, Sallstrom J, et al. Types of human papillomavirus revealed in cervical adenocarcinomas after DNA sequencing. *Oncol Rep* 2003;10(1):175-9.
- Andersson S, Mints M, Sallstrom J, Wilander E. The relative distribution of oncogenic types of human papillomavirus in benign, pre-malignant and malignant cervical biopsies. A study with human papillomavirus deoxyribonucleic acid sequence analysis. *Cancer Detect Prev* 2005;29(1):37-41.
- Andersson S, Safari H, Mints M, Lewensohn-Fuchs I, Gyllensten U, Johansson B. Type distribution, viral load and integration status of high-risk human papillomaviruses in pre-stages of cervical cancer (CIN). *Br J Cancer* 2005;92(12):2195-200.
- Anton G, Peltecu G, Socolov D, Cornitescu F, Bleotu C, Sgarbura Z, et al. Type-specific human papillomavirus detection in cervical smears in Romania. *APMIS* 2011;119(1):1-9.
- Arbyn M, Benoy I, Simoens C, Bogers J, Beutels P, Depuydt C. Prevacination distribution of human papillomavirus types in women attending at cervical cancer screening in Belgium. *Cancer Epidemiol Biomarkers Prev* 2009;18(1):321-30.
- Argyri E, Tsimplaki E, Daskalopoulou D, Stravopodis DJ, Kouikoglou O, Terzakis E, et al. E6/E7 mRNA expression of high-risk HPV types in 849 Greek women. *Anticancer Res* 2013;33(9):4007-11.
- Baalbergen A, Smedts F, Ewing P, Snijders PJ, Meijer CJ, Helmerhorst TJ. HPV-type has no impact on survival of patients with adenocarcinoma of the uterine cervix. *Gynecol Oncol* 2013;128(3):530-4.
- Baandrup L, Munk C, Andersen KK, Junge J, Iftner T, Kjaer SK. HPV16 is associated with younger age in women with cervical intraepithelial neoplasia grade 2 and 3. *Gynecol Oncol* 2012;124(2):281-5.
- Baay MF, Tjalma WA, Weyler J, Goovaerts G, Buytaert P, Van Marck EA, et al. Human papillomavirus infection in the female population of Antwerp, Belgium: prevalence in healthy women, women with premalignant lesions and cervical cancer. *Eur J Gynaecol Oncol* 2001;22(3):204-8.
- Baay MF, Tjalma WA, Lambrechts HA, Pattyn GG, Lardon F, Weyler J, et al. Combined Pap and HPV testing in primary screening for cervical abnormalities: should HPV detection be delayed until age 35? *Eur J Cancer* 2005;41(17):2704-8.
- Bachtiary B, Obermair A, Dreier B, Birner P, Breitenecker G, Knocke TH, et al. Impact of multiple HPV infection on response to treatment and survival in patients receiving radical radiotherapy for cervical cancer. *Int J Cancer* 2002;102(3):237-43.
- Bardin A, Vaccarella S, Clifford GM, Lissowska J, Rekosz M, Bobkiewicz P, et al. Human papillomavirus infection in women with and without cervical cancer in Warsaw, Poland. *Eur J Cancer* 2008;44(4):557-64.
- Barzon L, Militello V, Pagni S, Franchin E, Dal Bello F, Mengoli C, et al. Distribution of human papillomavirus types in the anogenital tract of females and males. *J Med Virol* 2010;82(8):1424-30.
- Barzon L, Militello V, Pagni S, Palu G. Comparison of INNO-LiPA genotyping extra and hybrid capture 2 assays for detection of carcinogenic human papillomavirus genotypes. *J Clin Virol* 2012;55(3):256-61.
- Baudu A, Pretet J-L, Riethmuller D, Chotard M, Mougin C, Mercier M. Prevalence and risk factors of human papillomavirus infection types 16/18/45 in a cohort of French females aged 15-23years. *J Epidemiol Glob Health* 2014;4(1):35-43.

- Beby-Defaux A, Bourgoin A, Ragot S, Battandier D, Lemasson JM, Renaud O, et al. Human papillomavirus infection of the cervix uteri in women attending a Health Examination Center of the French social security. *J Med Virol* 2004;73(2):262-8.
- Bekkers RL, Bulten J, Wiersma-van TA, Mravunac M, Schijf CP, Massuger LF, et al. Coexisting high-grade glandular and squamous cervical lesions and human papillomavirus infections. *Br J Cancer* 2003;89(5):886-90.
- Bello BD, Spinillo A, Alberizzi P, Cesari S, Gardella B, D'Ambrosio G, et al. Cervical infections by multiple human papillomavirus (HPV) genotypes: Prevalence and impact on the risk of precancerous epithelial lesions. *J Med Virol* 2009;81(4):703-12.
- Bernal M, Burillo I, Mayordomo JI, Moros M, Benito R, Gil J. Human papillomavirus (HPV) infection and intraepithelial neoplasia and invasive cancer of the uterine cervix: A case-control study in Zaragoza, Spain. *Infectious Agents and Cancer* 2008;3:8.
- Bertelsen BI, Kugarajh K, Skar R, Laerum OD. HPV subtypes in cervical cancer biopsies between 1930 and 2004: detection using general primer pair PCR and sequencing. *Virchows Arch* 2006;449(2):141-7.
- Birner P, Bachtiry B, Dreier B, Schindl M, Joura EA, Breitenecker G, et al. Signal-amplified colorimetric in situ hybridization for assessment of human papillomavirus infection in cervical lesions. *Mod Pathol* 2001;14(7):702-9.
- Bonvicini F, Venturoli S, Ambretti S, Paterini P, Santini D, Ceccarelli C, et al. Presence and type of oncogenic human papillomavirus in classic and in differentiated vulvar intraepithelial neoplasia and keratinizing vulvar squamous cell carcinoma. *J Med Virol* 2005;77(1):102-6.
- Brentnall AR, Vasiljevic N, Scibior-Bentkowska D, Cadman L, Austin J, Szarewski A, et al. A DNA methylation classifier of cervical precancer based on human papillomavirus and human genes. *Int J Cancer* 2014;135(6):1425-32.
- Broccolo F, Chiari S, Piana A, Castiglia P, Dell'Anna T, Garcia-Parra R, et al. Prevalence and viral load of oncogenic human papillomavirus types associated with cervical carcinoma in a population of North Italy. *J Med Virol* 2009;81(2):278-87.
- Broccolo F, Fusetti L, Rosini S, Caraceni D, Zappacosta R, Ciccocioppo L, et al. Comparison of oncogenic HPV type-specific viral DNA load and E6/E7 mRNA detection in cervical samples: results from a multicenter study. *J Med Virol* 2013;85(3):472-82.
- Bryant D, Rai N, Rowlands G, Hibbitts S, Jones J, Tristram A, et al. Human papillomavirus type distribution in vulval intraepithelial neoplasia determined using PapilloCheck DNA Microarray. *J Med Virol* 2011;83(8):1358-61.
- Bulk S, Berkhof J, Bulkman NW, Zielinski GD, Rozendaal L, van Kemenade FJ, et al. Preferential risk of HPV16 for squamous cell carcinoma and of HPV18 for adenocarcinoma of the cervix compared to women with normal cytology in The Netherlands. *Br J Cancer* 2006;94(1):171-5.
- Bulk S, Berkhof J, Rozendaal L, Fransen Daalmeijer NC, Gok M, de Schipper FA, et al. The contribution of HPV18 to cervical cancer is underestimated using high-grade CIN as a measure of screening efficiency. *Br J Cancer* 2007;96(8):1234-6.
- Bulkman NW, Bleeker MC, Berkhof J, Voorhorst FJ, Snijders PJ, Meijer CJ. Prevalence of types 16 and 33 is increased in high-risk human papillomavirus positive women with cervical intraepithelial neoplasia grade 2 or worse. *Int J Cancer* 2005;117(2):177-81.

- Carozzi F, De ML, Gillio-Tos A, Del MA, Girlando S, Baboci L, et al. Age and geographic variability of human papillomavirus high-risk genotype distribution in a large unvaccinated population and of vaccination impact on HPV prevalence. *J Clin Virol* 2014;60(3):257-63.
- Carozzi FM, Confortini M, Cecchini S, Bisanzi S, Cariaggi MP, Pontenani G, et al. Triage with human papillomavirus testing of women with cytologic abnormalities prompting referral for colposcopy assessment. *Cancer* 2005;105(1):2-7.
- Carozzi FM, Tornesello ML, Burrioni E, Loquercio G, Carillo G, Angeloni C, et al. Prevalence of human papillomavirus types in high-grade cervical intraepithelial neoplasia and cancer in Italy. *Cancer Epidemiol Biomarkers Prev* 2010;19(9):2389-400.
- Casalegno JS, Benchaib M, Le Bail CK, Piaton E, Mathevet P, Mekki Y. Human papillomavirus genotype distribution among French women with and without cervical abnormalities. *Int J Gynaecol Obstet* 2011;114(2):116-9.
- Castellsague X, Iftner T, Roura E, Vidart JA, Kjaer SK, Bosch FX, et al. Prevalence and genotype distribution of human papillomavirus infection of the cervix in Spain: the CLEOPATRE study. *J Med Virol* 2012;84(6):947-56.
- Centurioni MG, Puppo A, Merlo DF, Pasciucco G, Cusimano ER, Sirito R, et al. Prevalence of human papillomavirus cervical infection in an Italian asymptomatic population. *BMC Infect Dis* 2005;5:77.
- Cercato MC, Mariani L, Vocaturo A, Carrone A, Terrenato I, Morano G, et al. Predictors of human papilloma virus (HPV) infection in Italian women. *J Med Virol* 2010;82(11):1921-7.
- Chironna M, Neve A, Sallustio A, De RA, Quarto M, Germinario C, et al. Frequency of human papillomavirus infection and genotype distribution among women with known cytological diagnosis in a Southern Italian region. *J Prev Med Hyg* 2010;51(4):139-45.
- Ciotti M, Paba P, Bonifacio D, Di Bonito L, Benedetto A, Favalli C. Single or multiple HPV types in cervical cancer and associated metastases. *Oncol Rep* 2006;15(1):143-8.
- Conesa-Zamora P, Ortiz-Reina S, Moya-Biosca J, Domenech-Peris A, Orantes-Casado FJ, Perez-Guillermo M, et al. Genotype distribution of human papillomavirus (HPV) and co-infections in cervical cytologic specimens from two outpatient gynecological clinics in a region of southeast Spain. *BMC Infect Dis* 2009;9:124.
- Confortini M, Carozzi F, Zappa M, Ventura L, Iossa A, Cariaggi P, et al. Human papillomavirus infection and risk factors in a cohort of Tuscan women aged 18-24: results at recruitment. *BMC Infect Dis* 2010;10:157-67.
- Costa S, Venturoli S, Mennini FS, Marcellusi A, Pesaresi M, Leo E, et al. Population-based frequency assessment of HPV-induced lesions in patients with borderline Pap tests in the Emilia-Romagna Region: the PATER study. *Curr Med Res Opin* 2011;27(3):569-78.
- Coupe VM, Berkhof J, Bulkman NW, Snijders PJ, Meijer CJ. Age-dependent prevalence of 14 high-risk HPV types in the Netherlands: implications for prophylactic vaccination and screening. *Br J Cancer* 2008;98(3):646-51.
- Cuschieri KS, Cubie HA, Whitley MW, Seagar AL, Arends MJ, Moore C, et al. Multiple high risk HPV infections are common in cervical neoplasia and young women in a cervical screening population. *J Clin Pathol* 2004;57(1):68-72.



- Cuschieri K, Brewster DH, Williams AR, Millan D, Murray G, Nicoll S, et al. Distribution of HPV types associated with cervical cancers in Scotland and implications for the impact of HPV vaccines. *Br J Cancer* 2010;102(5):930-2.
- Cuschieri K, Kavanagh K, Sinka K, Robertson C, Cubie H, Moore C, et al. Effect of HPV assay choice on perceived prevalence in a population-based sample. *Diagn Mol Pathol* 2013;22(2):85-90.
- Cuzick J, Terry G, Ho L, Monaghan J, Lopes A, Clarkson P, et al. Association between high-risk HPV types, HLA DRB1\* and DQB1\* alleles and cervical cancer in British women. *Br J Cancer* 2000;82(7):1348-52.
- Dabic MM, Hlupic L, Babic D, Jukic S, Seiwert S. Comparison of polymerase chain reaction and catalyzed signal amplification in situ hybridization methods for human papillomavirus detection in paraffin-embedded cervical preneoplastic and neoplastic lesions. *Arch Med Res* 2004;35(6):511-6.
- Dabic MM, Nola M, Tomicic I, Dotlic S, Petroveckii M, Jukic S. Adenocarcinoma of the uterine cervix: prognostic significance of clinicopathologic parameters, flow cytometry analysis and HPV infection. *Acta Obstet Gynecol Scand* 2008;87(3):366-72.
- Dahlstrom LA, Ylitalo N, Sundstrom K, Palmgren J, Ploner A, Eloranta S, et al. Prospective study of human papillomavirus and risk of cervical adenocarcinoma. *Int J Cancer* 2010;127(8):1923-30.
- Darlin L, Borgfeldt C, Forslund O, Henic E, Hortlund M, Dillner J, et al. Comparison of use of vaginal HPV self-sampling and offering flexible appointments as strategies to reach long-term non-attending women in organized cervical screening. *J Clin Virol* 2013;58(1):155-60.
- de Bie RP, van de Nieuwenhof HP, Bekkers RL, Melchers WJ, Siebers AG, Bulten J, et al. Patients with usual vulvar intraepithelial neoplasia-related vulvar cancer have an increased risk of cervical abnormalities. *Br J Cancer* 2009;101(1):27-31.
- De Francesco MA, Gargiulo F, Schreiber C, Ciravolo G, Salinaro F, Manca N. Detection and genotyping of human papillomavirus in cervical samples from Italian patients. *J Med Virol* 2005;75(4):588-92.
- De Francesco MA, Gargiulo F, Schreiber C, Ciravolo G, Salinaro F, Manca N. Prevacination distribution of human papillomavirus types in Italian women with high-risk lesions and cervical neoplasia. *Intervirology* 2010;53(6):417-25.
- de Jonge M, Busecke G, Heinecke A, Bettendorf O. Human papillomavirus genotype distribution in cytologically screened women from northwest Germany. *Acta Cytol* 2013;57(6):591-8.
- de Sanjose S, Almirall R, Lloveras B, Font R, Diaz M, Munoz N, et al. Cervical human papillomavirus infection in the female population in Barcelona, Spain. *Sex Transm Dis* 2003;30(10):788-93.
- Del Prete R, Di Taranto AM, Lipsi MR, Nirchio V, Antonetti R, Miragliotta G. Prevalence and genotypes identification of human papillomavirus infection in a population of South Italy. *J Clin Virol* 2008;42(2):211-4.
- Delere Y, Remschmidt C, Leuschner J, Schuster M, Fesenfeld M, Schneider A, et al. Human Papillomavirus prevalence and probable first effects of vaccination in 20 to 25 year-old women in Germany: a population-based cross-sectional study via home-based self-sampling. *BMC Infect Dis* 2014;14:87.
- Depuydt CE, Vereecken AJ, Salembier GM, Vanbrabant AS, Boels LA, van Herck E, et al. Thin-layer liquid-based cervical cytology and PCR for detecting and typing human papillomavirus DNA in Flemish women. *Br J Cancer* 2003;88(4):560-6.

- Dobec M, Bannwart F, Kaeppli F, Cassinotti P. Automation of the linear array HPV genotyping test and its application for routine typing of human papillomaviruses in cervical specimens of women without cytological abnormalities in Switzerland. *J Clin Virol* 2009;45(1):23-7.
- Du J, Nasman A, Carlson JW, Ramqvist T, Dalianis T. Prevalence of human papillomavirus (HPV) types in cervical cancer 2003-2008 in Stockholm, Sweden, before public HPV vaccination. *Acta Oncol* 2011;50(8):1215-9.
- Duvlis S, Plaseska-Karanfilska D. A variant of human papillomavirus (HPV) type 66 is common among HPV-infected women from the Republic of Macedonia. *Balkan Journal of Medical Genetics* 2001;4(3-4):53.
- Dybikowska A, Licznarski P, Podhajska A. HPV detection in cervical cancer patients in northern Poland. *Oncol Rep* 2002;9(4):871-4.
- Faust H, Jelen MM, Poljak M, Klavs I, Ucakar V, Dillner J. Serum antibodies to human papillomavirus (HPV) pseudovirions correlate with natural infection for 13 genital HPV types. *J Clin Virol* 2013;56(4):336-41.
- Ferreira M, Crespo M, Martins L, Felix A. HPV DNA detection and genotyping in 21 cases of primary invasive squamous cell carcinoma of the vagina. *Mod Pathol* 2008;21(8):968-72.
- Filipi K, Tedeschini A, Paolini F, Celicu S, Morici S, Kota M, et al. Genital human papillomavirus infection and genotype prevalence among Albanian women: a cross-sectional study. *J Med Virol* 2010;82(7):1192-6.
- Forslund O, Antonsson A, Edlund K, van den Brule AJ, Hansson BG, Meijer CJ, et al. Population-based type-specific prevalence of high-risk human papillomavirus infection in middle-aged Swedish women. *J Med Virol* 2002;66(4):535-41.
- Fuste V, del Pino M, Perez A, Garcia A, Torne A, Pahisa J, et al. Primary squamous cell carcinoma of the vagina: human papillomavirus detection, p16(INK4A) overexpression and clinicopathological correlations. *Histopathology* 2010;57(6):907-16.
- Garcia-Espinosa B, Moro-Rodriguez E, Alvarez-Fernandez E. Genotype distribution of human papillomavirus (HPV) in histological sections of cervical intraepithelial neoplasia and invasive cervical carcinoma in Madrid, Spain. *BMC Cancer* 2012;12:533.
- Gargiulo F, De Francesco MA, Schreiber C, Ciravolo G, Salinaro F, Valloncini B, et al. Prevalence and distribution of single and multiple HPV infections in cytologically abnormal cervical samples from Italian women. *Virus Res* 2007;125(2):176-82.
- Giambi C, Donati S, Carozzi F, Salmaso S, Declich S, Atti ML, et al. A cross-sectional study to estimate high-risk human papillomavirus prevalence and type distribution in Italian women aged 18-26 years. *BMC Infect Dis* 2013;13:74.
- Giorgi Rossi P, Bisanzzi S, Paganini I, Di Iasi A, Angeloni C, Scalisi A, et al. Prevalence of HPV high and low risk types in cervical samples from the Italian general population: a population based study. *BMC Infect Dis* 2010;10:214.
- Giorgi Rossi P, Chini F, Bisanzzi S, Burrioni E, Carillo G, Lattanzi A, et al. Distribution of high and low risk HPV types by cytological status: a population based study from Italy. *Infect Agent Cancer* 2011;6(1):2.

- Giorgi Rossi P, Sideri M, Carozzi FM, Vocaturo A, Buonaguro FM, Tornesello ML, et al. HPV type distribution in invasive cervical cancers in Italy: pooled analysis of three large studies. *Infect Agent Cancer* 2012;7(1):26.
- Giovannelli L, Vassallo R, Matranga D, Affronti M, Caleca MP, Bellavia C, et al. Prevalence of cervical human papillomavirus infection and types among women immigrated to Sicily, Italy. *Acta Obstet Gynecol Scand* 2009;88(6):737-42.
- Giuffre G, Simone A, Todaro P, Le Donne M, Caruso C, Pizzo A, et al. Detection and genotyping of human papillomavirus in gynaecologic outpatients of Messina, eastern Sicily, Italy. *Oncol Rep* 2010;23(3):745-50.
- Goldman B, Rebolj M, Rygaard C, Preisler S, Ejegod DM, Lynge E, et al. Patterns of cervical coinfection with multiple human papilloma virus types in a screening population in Denmark. *Vaccine* 2013;31(12):1604-9.
- Gonzalez-Bosquet E, Esteva C, Munoz-Almagro C, Ferrer P, Perez M, Laila JM. Identification of vaccine human papillomavirus genotypes in squamous intraepithelial lesions (CIN2-3). *Gynecol Oncol* 2008;111(1):9-12.
- Grahovac M, Racic I, Hadzisejdic I, Doric A, Grahovac B. Prevalence of human papillomavirus among Croatian women attending regular gynecological visit. *Coll Antropol* 2007;31 Suppl 2:73-7.
- Gudleviciene Z, Didziapetriene J, Ramael M, Uleckiene S, Valuckas KP. Human papillomavirus and p53 polymorphism in Lithuanian cervical cancer patients. *Gynecol Oncol* 2006;102(3):530-3.
- Gudleviciene Z, Kanopiene D, Didziapetriene J, Smolyakova R, Gutkovskaya E, Zhukovec A, et al. Differences on the prevalence of cervical HPV between Lithuania and Belarus. *Cent Eur J Med* 2014;9(2):285-91.
- Guido M, Tinelli A, De DA, Bruno AR, Tagliaferro L, Fedele A, et al. Prevalence and distribution of human papillomavirus genotype in south eastern Italy, in the period 2006-2011: implications for intervention. *Curr Pharm Des* 2013;19(8):1498-507.
- Hadzisejdic I, Simat M, Bosak A, Krasevic M, Grahovac B. Prevalence of human papillomavirus genotypes in cervical cancer and precursor lesions. *Coll Antropol* 2006;30(4):879-83.
- Hadzisejdc I, Krasevic M, Haller H, Grahovac B. Distribution of human papillomavirus types in different histological subtypes of cervical adenocarcinoma. *Coll Antropol* 2007;31 Suppl 2:97-102.
- Hall JS, Iype R, Armenoult LS, Taylor J, Miller CJ, Davidson S, et al. Poor prognosis associated with human papillomavirus alpha7 genotypes in cervical carcinoma cannot be explained by intrinsic radiosensitivity. *Int J Radiat Oncol Biol Phys* 2013;85(5):e223-e229.
- Hampf M, Sarajuuri H, Wentzensen N, Bender HG, Kueppers V. Effect of human papillomavirus vaccines on vulvar, vaginal, and anal intraepithelial lesions and vulvar cancer. *Obstet Gynecol* 2006;108(6):1361-8.
- Hampf M, Deckers-Figiel S, Hampf JA, Rein D, Bender HG. New aspects of vulvar cancer: changes in localization and age of onset. *Gynecol Oncol* 2008;109(3):340-5.
- Heard I, Tondeur L, Arowas L, Falguieres M, Demazoin MC, Favre M. Human papillomavirus types distribution in organised cervical cancer screening in france. *PLoS One* 2013;8(11):e79372.

- Hellman K, Lindquist D, Ranhem C, Wilander E, Andersson S. Human papillomavirus, p16(INK4A), and Ki-67 in relation to clinicopathological variables and survival in primary carcinoma of the vagina. *Br J Cancer* 2014;110(6):1561-70.
- Herraez-Hernandez E, Alvarez-Perez M, Navarro-Bustos G, Esquivias J, Alonso S, Aneiros-Fernandez J, et al. HPV Direct Flow CHIP: a new human papillomavirus genotyping method based on direct PCR from crude-cell extracts. *J Virol Methods* 2013;193(1):9-17.
- Hibbitts S, Jones J, Powell N, Dallimore N, McRea J, Beer H, et al. Human papillomavirus prevalence in women attending routine cervical screening in South Wales, UK: a cross-sectional study. *Br J Cancer* 2008;99(11):1929-33.
- Hibbitts S, Tristram A, Beer H, McRea J, Rose B, Hauke A, et al. UK population based study to predict impact of HPV vaccination. *J Clin Virol* 2014;59(2):109-14.
- Houghton O, Jamison J, Wilson R, Carson J, McCluggage WG. p16 Immunoreactivity in unusual types of cervical adenocarcinoma does not reflect human papillomavirus infection. *Histopathology* 2010;57(3):342-50.
- Howell-Jones R, Bailey A, Beddows S, Sargent A, de Silva N, Wilson G, et al. Multi-site study of HPV type-specific prevalence in women with cervical cancer, intraepithelial neoplasia and normal cytology, in England. *Br J Cancer* 2010;103(2):209-16.
- Howell-Jones R, de SN, Akpan M, Oakeshott P, Carder C, Coupland L, et al. Prevalence of human papillomavirus (HPV) infections in sexually active adolescents and young women in England, prior to widespread HPV immunisation. *Vaccine* 2012;30(26):3867-75.
- Iftner T, Eberle S, Iftner A, Holz B, Banik N, Quint W, et al. Prevalence of low-risk and high-risk types of human papillomavirus and other risk factors for HPV infection in Germany within different age groups in women up to 30 years of age: an epidemiological observational study. *J Med Virol* 2010;82(11):1928-39.
- Ivansson EL, Gustavsson IM, Wilander E, Magnusson PK, Gyllensten UB. Temporal trends over 3 decades and intrafamilial clustering of HPV types in Swedish patients with cervical cancer in situ. *Int J Cancer* 2009;125(12):2930-5.
- Jacobs MV, Walboomers JM, Snijders PJ, Voorhorst FJ, Verheijen RH, Fransen-Daalmeijer N, et al. Distribution of 37 mucosotropic HPV types in women with cytologically normal cervical smears: the age-related patterns for high-risk and low-risk types. *Int J Cancer* 2000;87(2):221-7.
- Jalal H, Stephen H, Bibby DF, Sonnex C, Carne CA. Molecular epidemiology of genital human papillomavirus and Chlamydia trachomatis among patients attending a genitourinary medicine clinic - will vaccines protect? *Int J STD AIDS* 2007;18(9):617-21.
- Jancar N, Kocjan BJ, Poljak M, Lunar MM, Bokal EV. Distribution of human papillomavirus genotypes in women with cervical cancer in Slovenia. *Eur J Obstet Gynecol Reprod Biol* 2009;145(2):184-8.
- Jovanovic AM, Dikic SD, Jovanovic V, Zamurovic M, Nikolic B, Krsic V, et al. Correlation of human papilloma virus infection with cytology, colposcopy and histopathological examination of the bioptic tissue in low- and high-grade intraepithelial lesions. *Eur J Gynaecol Oncol* 2012;33(5):512-6.
- Kaliterna V, Andelinovic S, Pejkoivic L, Hofman ID. Human papillomavirus DNA typing in the cervical specimens among women of Split and Dalmatian County. *Coll Antropol* 2007;31 Suppl 2:79-82.

- Kaliterna V, Kaliterna M, Pejkovic L, Hofman ID, Andelinovic S. Prevalence and genotyping of the human papillomavirus in the cervical specimens among women of Southern Croatia (Dalmatia County). *Cent Eur J Public Health* 2013;21(1):26-9.
- Kavanagh K, Sinka K, Cuschieri K, Love J, Potts A, Pollock KG, et al. Estimation of HPV prevalence in young women in Scotland; monitoring of future vaccine impact. *BMC Infect Dis* 2013;13:519.
- Kavanagh K, Pollock KG, Potts A, Love J, Cuschieri K, Cubie H, et al. Introduction and sustained high coverage of the HPV bivalent vaccine leads to a reduction in prevalence of HPV 16/18 and closely related HPV types. *Br J Cancer* 2014;110(11):2804-11.
- Keegan H, Pilkington L, McInerney J, Jeney C, Benczik M, Cleary S, et al. Human papillomavirus detection and genotyping, by HC2, full-spectrum HPV and molecular beacon real-time HPV assay in an Irish colposcopy clinic. *J Virol Methods* 2014;201:93-100.
- Kirschner B, Junge J, Holl K, Rosenlund M, De Souza SC, Quint W, et al. HPV- genotypes in invasive cervical cancer in Danish women. *Acta Obstet Gynecol Scand* 2013;92(9):1023-31.
- Kirschner B, Schledermann D, Holl K, Rosenlund M, Raillard A, Quint W, et al. HPV-genotypes in high-grade intraepithelial cervical lesions in Danish women. *Acta Obstet Gynecol Scand* 2013; 92(9):1032-40.
- Kjaer SK, van den Brule AJ, Paull G, Svare EI, Sherman ME, Thomsen BL, et al. Type specific persistence of high risk human papillomavirus (HPV) as indicator of high grade cervical squamous intraepithelial lesions in young women: population based prospective follow up study. *BMJ* 2002;325(7364):572
- Kjaer SK, Breugelmans G, Munk C, Junge J, Watson M, Iftner T. Population-based prevalence, type- and age-specific distribution of HPV in women before introduction of an HPV-vaccination program in Denmark. *Int J Cancer* 2008;123(8):1864-70.
- Kjaer SK, Frederiksen K, Munk C, Iftner T. Long-term absolute risk of cervical intraepithelial neoplasia grade 3 or worse following human papillomavirus infection: role of persistence. *J Natl Cancer Inst* 2010;102(19):1478-88.
- Kjaer SK, Munk C, Junge J, Iftner T. Carcinogenic HPV prevalence and age-specific type distribution in 40,382 women with normal cervical cytology, ASCUS/LSIL, HSIL, or cervical cancer: what is the potential for prevention? *Cancer Causes Control* 2014;25(2):179-89.
- Klemba A, Kowalewska M, Kukwa W, Tonska K, Szybinska A, Mossakowska M, et al. Mitochondrial genotype in vulvar carcinoma - cuckoo in the nest. *J Biomed Sci* 2010;17:73.
- Klug SJ, Hukelmann M, Hollwitz B, Duzenli N, Schopp B, Petry KU, et al. Prevalence of human papillomavirus types in women screened by cytology in Germany. *J Med Virol* 2007;79(5):616-25.
- Konidaris S, Kouskouni EE, Panoskaltsis T, Kreatsas G, Patsouris ES, Sarivalassis A, et al. Human papillomavirus infection in malignant and benign gynaecological conditions: a study in Greek women. *Health Care Women Int* 2007;28(2):182-91.
- Kovachev S, Slavov V, Slavova K. Prevalence of human papillomavirus infection in women in some cities and regions of Bulgaria. *J Med Virol* 2013;85(9):1577-84.
- Kovanda A, Juvan U, Sterbenc A, Kocjan BJ, Seme K, Jancar N, et al. Pre-vaccination distribution of human papillomavirus (HPV) genotypes in women with cervical intraepithelial neoplasia grade 3 (CIN 3) lesions in Slovenia. *Acta Dermatovenerol Alp Panonica Adriat* 2009;18(2):47-52.

- Kowalewska M, Szkoda MT, Radziszewski J, Ptaszynski K, Bidzinski M, Siedlecki JA. The frequency of human papillomavirus infection in polish patients with vulvar squamous cell carcinoma. *Int J Gynecol Cancer* 2010;20(3):434-7.
- Kraus I, Molden T, Holm R, Lie AK, Karlsen F, Kristensen GB, et al. Presence of E6 and E7 mRNA from human papillomavirus types 16, 18, 31, 33, and 45 in the majority of cervical carcinomas. *J Clin Microbiol* 2006;44(4):1310-7.
- Kulmala SM, Shabalova IP, Petrovitchev N, Syrjanen KJ, Gyllensten UB, Syrjanen SM. Prevalence of the most common high-risk HPV genotypes among women in three new independent states of the former Soviet Union. *J Med Virol* 2007;79(6):771-81.
- Larsson GL, Helenius G, Andersson S, Elgh F, Sorbe B, Karlsson MG. Human papillomavirus (HPV) and HPV 16-variant distribution in vulvar squamous cell carcinoma in Sweden. *Int J Gynecol Cancer* 2012;22(8):1413-9.
- Larsson GL, Helenius G, Andersson S, Sorbe B, Karlsson MG. Prognostic impact of human papilloma virus (HPV) genotyping and HPV-16 subtyping in vaginal carcinoma. *Gynecol Oncol* 2013;129(2):406-11.
- Le Donne M, Giuffre G, Caruso C, Nicotina PA, Alibrandi A, Scalisi R, et al. Human Papillomavirus Types Distribution in Eastern Sicilian Females with cervical lesions. A Correlation with Colposcopic and Histological Findings. *Pathol Oncol Res* 2013;19(3):481-7.
- Leinonen MK, Anttila A, Malila N, Dillner J, Forslund O, Nieminen P. Type- and age-specific distribution of human papillomavirus in women attending cervical cancer screening in Finland. *Br J Cancer* 2013;109(11):2941-50.
- Lenselink CH, Melchers WJ, Quint WG, Hoebbers AM, Hendriks JC, Massuger LF, et al. Sexual behaviour and HPV infections in 18 to 29 year old women in the pre-vaccine era in the Netherlands. *PLoS ONE* 2008;3(11):e3743.
- Lindell G, Nasman A, Jonsson C, Ehrsson RJ, Jacobsson H, Danielsson KG, et al. Presence of human papillomavirus (HPV) in vulvar squamous cell carcinoma (VSCC) and sentinel node. *Gynecol Oncol* 2010;117(2):312-6.
- Louvanto K, Rintala MA, Syrjanen KJ, Grenman SE, Syrjanen SM. Incident cervical infections with high- and low-risk human papillomavirus (HPV) infections among mothers in the prospective Finnish Family HPV Study. *BMC Infect Dis* 2011;11:179.
- Lukaszuk K, Liss J, Wozniak I, Sliwinski W, Emerich J, Wojcikowski C. HPV and histological status of pelvic lymph node metastases in cervical cancer: a prospective study. *J Clin Pathol* 2004;57(5):472-6.
- Mariani L, Monfulleda N, Alemany L, Vizza E, Marandino F, Vocaturo A, et al. Human papillomavirus prevalence and type-specific relative contribution in invasive cervical cancer specimens from Italy. *BMC Cancer* 2010;10:259.
- Martin P, Kilany L, Garcia D, Lopez-Garcia AM, Martin-Azana MJ, Abreira V, et al. Human papillomavirus genotype distribution in Madrid and correlation with cytological data. *BMC Infect Dis* 2011;11:316.
- Martorell M, Garcia-Garcia JA, Ortiz C, Perez-Valles A, Calabuig C, Gomez-Cabrero D, et al. Prevalence and distribution of human papillomavirus findings in swab specimens from gynaecology clinics of the east coast of Spain. *Scand J Infect Dis* 2010;42(6-7):549-53.

- Martro E, Valencia MJ, Tarrats A, Castella E, Llatjos M, Franquesa S, et al. Comparison between two human papillomavirus genotyping assays targeting the L1 or E6/E7 region in cervical cancer biopsies. *Enferm Infecc Microbiol Clin* 2012;30(5):225-9.
- Mateos Lindemann ML, Sanchez Calvo JM, Chacon de AJ, Sanz I, Diaz E, Rubio MD, et al. Prevalence and Distribution of High-Risk Genotypes of HPV in Women with Severe Cervical Lesions in Madrid, Spain: Importance of Detecting Genotype 16 and Other High-Risk Genotypes. *Adv Prev Med* 2011;2011:269468.
- Mazarico E, Gonzalez-Bosquet E. Prevalence of infection by different genotypes of human papillomavirus in women with cervical pathology. *Gynecol Oncol* 2012;125(1):181-5.
- Mejlhede N, Bonde J, Fomsgaard A. High frequency of multiple HPV types in cervical specimens from Danish women. *APMIS* 2009;117(2):108-14.
- Menegazzi P, Barzon L, Palu G, Reho E, Tagliaferro L. Human papillomavirus type distribution and correlation with cyto-histological patterns in women from the South of Italy. *Infect Dis Obstet Gynecol* 2009;2009:198425.
- Meshar D, Soldan K, Howell-Jones R, Panwar K, Manyenga P, Jit M, et al. Reduction in HPV 16/18 prevalence in sexually active young women following the introduction of HPV immunisation in England. *Vaccine* 2013;32(1):26-32.
- Michala L, Argyri E, Tsimplaki E, Tsitsika A, Bakoula C, Antsaklis A, et al. Human Papilloma Virus infection in sexually active adolescent girls. *Gynecol Oncol* 2012;126(2):207-10.
- Milanova E, Naumov J, Stojovski M, Todorovska I, Daneva K. Operative treatment of cervical premalignant lesions and the presence of high-risk human papilloma virus as etiologic agent. *Bratisl Lek Listy* 2004;105(10-11):365-7.
- Molden T, Kraus I, Karlsen F, Skomedal H, Nygard JF, Hagmar B. Comparison of human papillomavirus messenger RNA and DNA detection: a cross-sectional study of 4,136 women >30 years of age with a 2-year follow-up of high-grade squamous intraepithelial lesion. *Cancer Epidemiol Biomarkers Prev* 2005;14(2):367-72.
- Mollers M, Scherpenisse M, van der Klis FR, King AJ, van Rossum TG, van Logchem EM, et al. Prevalence of genital HPV infections and HPV serology in adolescent girls, prior to vaccination. *Cancer Epidemiol* 2012;36(6):519-24.
- Mollers M, Boot HJ, Vriend HJ, King AJ, van den Broek Ingrid VF, van Bergen Jan EA, et al. Prevalence, incidence and persistence of genital HPV infections in a large cohort of sexually active young women in the Netherlands. *Vaccine* 2013;31(2):394-401.
- Monsonogo J, Zerat L, Syrjanen K, Zerat JC, Smith JS, Halfon P. Prevalence of type-specific human papillomavirus infection among women in France: Implications for screening, vaccination, and a future generation of multivalent HPV vaccines. *Vaccine* 2012;30(35):5215-21.
- Murphy N, Ring M, Killalea AG, Uhlmann V, O'Donovan M, Mulcahy F, et al. p16INK4A as a marker for cervical dyskaryosis: CIN and cGIN in cervical biopsies and ThinPrep smears. *J Clin Pathol* 2003;56(1):56-63.
- Nielsen A, Kjaer SK, Munk C, Iftner T. Type-specific HPV infection and multiple HPV types: prevalence and risk factor profile in nearly 12,000 younger and older Danish women. *Sex Transm Dis* 2008;35(3):276-82.

- Nielsen A, Iftner T, Munk C, Kjaer SK. Acquisition of high-risk human papillomavirus infection in a population-based cohort of Danish women. *Sex Transm Dis* 2009;36(10):609-15.
- Nobre RJ, Cruz E, Real O, de Almeida LP, Martins TC. Characterization of common and rare human papillomaviruses in Portuguese women by the polymerase chain reaction, restriction fragment length polymorphism and sequencing. *J Med Virol* 2010;82(6):1024-32.
- Oakeshott P, Aghaizu A, Reid F, Howell-Jones R, Hay PE, Sadiq ST, et al. Frequency and risk factors for prevalent, incident, and persistent genital carcinogenic human papillomavirus infection in sexually active women: community based cohort study. *BMJ* 2012;344:e4168.
- Oliveira A, Verdasca N, Pista A. Use of the NucliSENS EasyQ HPV assay in the management of cervical intraepithelial neoplasia. *J Med Virol* 2013;85(7):1235-41.
- Orlando G, Fasolo M, Mazza F, Ricci E, Esposito S, Frati E, et al. Risk of cervical HPV infection and prevalence of vaccine-type and other high-risk HPV types among sexually active teens and young women (13-26 years) enrolled in the VALHIDATE study. *Hum Vaccin Immunother* 2014;10(4):986-94.
- Ortiz M, Torres M, Munoz L, Fernandez-Garcia E, Canals J, Cabornero AI, et al. Oncogenic human papillomavirus (HPV) type distribution and HPV type 16 E6 variants in two Spanish population groups with different levels of HPV infection risk. *J Clin Microbiol* 2006;44(4):1428-34.
- Otero-Motta AP, Ordonez JL, Gonzalez-Celador R, Rivas B, Macias MC, Bullon A, et al. Prevalence of human papillomavirus genotypes in cytologic abnormalities from unvaccinated women living in north-western Spain. *APMIS* 2011;119(3):204-15.
- Panatto D, Amicizia D, Tanzi E, Bianchi S, Frati ER, Zotti CM, et al. Prevalence of human papillomavirus in young Italian women with normal cytology: how should we adapt the national vaccination policy? *BMC Infect Dis* 2013;13:575.
- Pannier-Stockman C, Segard C, Bennamar S, Gondry J, Boulanger JC, Sevestre H, et al. Prevalence of HPV genotypes determined by PCR and DNA sequencing in cervical specimens from French women with or without abnormalities. *J Clin Virol* 2008;42(4):353-60.
- Panotopoulou E, Tserkezoglou A, Kouvousi M, Tsiaousi I, Chatzieleftheriou G, Daskalopoulou D, et al. Prevalence of human papillomavirus types 6, 11, 16, 18, 31, and 33 in a cohort of Greek women. *J Med Virol* 2007;79(12):1898-905.
- Perez C, Klaustermeier JE, Alemany L, Tous S, de SS, Velasco J. Comparison of 2 different PCR-based technologies for the detection of human papilloma virus from paraffin-embedded tissue: genomica clinical arrays versus SPF(10)-LiPA(25). *Diagn Mol Pathol* 2012;21(1):45-52.
- Perez C, Castillo M, Alemany L, Tous S, Klaustermeier J, de SS, et al. Evaluation of p16INK4a Overexpression in a Large Series of Cervical Carcinomas: Concordance With SPF10-LiPA25 PCR. *Int J Gynecol Pathol* 2014;33(1):74-82.
- Perez-Castro S, Lorenzo-Mahia Y, Inarrea FA, Lamas-Gonzalez MJ, Saran-Diez MT, Rubio-Alarcon J, et al. Cervical intraepithelial neoplasia grade 2 or worse in Galicia, Spain: HPV 16 prevalence and vaccination impact. *Enferm Infecc Microbiol Clin* 2014;32(8):479-85.
- Pete I, Szirmai K, Csapo Z, Szantho A, Fule T, Gallai M, et al. Detection of high-risk HPV (16, 18, 33) in situ cancer of the cervix by PCR technique. *Eur J Gynaecol Oncol* 2002;23(1):74-8.



- Petry KU, Luyten A, Justus A, Iftner A, Strehlke S, Reinecke-Luthge A, et al. Prevalence of high-risk HPV types and associated genital diseases in women born in 1988/89 or 1983/84--results of WOLVES, a population-based epidemiological study in Wolfsburg, Germany. *BMC Infect Dis* 2013;13:135.
- Piana A, Sotgiu G, Castiglia P, Pischedda S, Cocuzza C, Capobianco G, et al. Prevalence and type distribution of human papillomavirus infection in women from North Sardinia, Italy. *BMC Public Health* 2011;11:785.
- Piana A, Sotgiu G, Cocuzza C, Musumeci R, Marras V, Pischedda S, et al. High HPV-51 Prevalence in Invasive Cervical Cancers: Results of a Pre-Immunization Survey in North Sardinia, Italy. *PLoS ONE* 2013;8(5):e63395.
- Pista A, de Oliveira CF, Cunha MJ, Paixao MT, Real O. Prevalence of human papillomavirus infection in women in Portugal: the CLEOPATRE Portugal study. *Int J Gynecol Cancer* 2011;21(6):1150-8.
- Pista A, Oliveira A, Verdasca N, Ribeiro F. Single and multiple human papillomavirus infections in cervical abnormalities in Portuguese women. *Clin Microbiol Infect* 2011;17(6):941-6.
- Pista A, de Oliveira CF, Lopes C, Cunha MJ. Human papillomavirus type distribution in cervical intraepithelial neoplasia grade 2/3 and cervical cancer in Portugal: a CLEOPATRE II Study. *Int J Gynecol Cancer* 2013;23(3):500-6.
- Powell NG, Hibbitts SJ, Boyde AM, Newcombe RG, Tristram AJ, Fiander AN. The risk of cervical cancer associated with specific types of human papillomavirus: a case-control study in a UK population. *Int J Cancer* 2011;128(7):1676-82.
- Powell N, Cuschieri K, Cubie H, Hibbitts S, Rosillon D, De Souza SC, et al. Cervical cancers associated with human papillomavirus types 16, 18 and 45 are diagnosed in younger women than cancers associated with other types: a cross-sectional observational study in Wales and Scotland (UK). *J Clin Virol* 2013;58(3):571-4.
- Pretet JL, Jacquard AC, Carcopino X, Charlot JF, Bouhour D, Kantelip B, et al. Human papillomavirus (HPV) genotype distribution in invasive cervical cancers in France: EDITH study. *Int J Cancer* 2008;122(2):428-32.
- Pretet JL, Jacquard AC, Carcopino X, Monnier-Benoit S, Averous G, Soubeyrand B, et al. Human papillomavirus genotype distribution in high grade cervical lesions (CIN 2/3) in France: EDITH study. *Int J Cancer* 2008;122(2):424-7.
- Ramqvist T, Du J, Lunden M, Ahrlund-Richter S, Ferreira J, Marions L, et al. Pre-vaccination prevalence of human papillomavirus types in the genital tract of 15-23-year-old women attending a youth health clinic in Stockholm, Sweden. *Scand J Infect Dis* 2011;43(2):115-21.
- Reesink-Peters N, Burger MP, Kleter B, Quint WG, Bossuyt PM, Adriaanse AH. Using a new HPV detection system in epidemiological research: change of views on cervical dyskaryosis? *Eur J Obstet Gynecol Reprod Biol* 2001;98(2):199-204.
- Reuschenbach M, Roos J, Panayotopoulos D, Baldus SE, Schnurch HG, Berger A, et al. Characterization of squamous cell cancers of the vulvar anterior fourchette by human papillomavirus, p16INK4a, and p53. *J Low Genit Tract Dis* 2013;17(3):289-97.
- Ribaldone R, Boldorini R, Capuano A, Arrigoni S, Di Oto A, Surico N. Role of HPV testing in the follow-up of women treated for cervical dysplasia. *Arch Gynecol Obstet* 2010;282(2):193-7.

- Ripabelli G, Grasso GM, Del R, I, Tamburro M, Sammarco ML. Prevalence and genotype identification of human papillomavirus in women undergoing voluntary cervical cancer screening in Molise, Central Italy. *Cancer Epidemiol* 2010;34(2):162-7.
- Roberts CC, Tadesse AS, Sands J, Halvorsen T, Schofield TL, Dalen A, et al. Detection of HPV in Norwegian cervical biopsy specimens with type-specific PCR and reverse line blot assays. *J Clin Virol* 2006;36(4):277-82.
- Roccio M, Dal BB, Gardella B, Carrara M, Gulminetti R, Mariani B, et al. HPV infection and intraepithelial lesions: comparison between HIV positive and negative women. *Curr HIV Res* 2012;10(7):614-9.
- Rogovskaya SI, Shabalova IP, Mikheeva IV, Minkina GN, Podzolkova NM, Shipulina OY, et al. Human Papillomavirus Prevalence and Type-Distribution, Cervical Cancer Screening Practices and Current Status of Vaccination Implementation in Russian Federation, the Western Countries of the former Soviet Union, Caucasus Region and Central Asia. *Vaccine* 2013;31 Suppl 7:H46-H58.
- Ronco G, Ghisetti V, Segnan N, Snijders PJ, Gillio-Tos A, Meijer CJ, et al. Prevalence of human papillomavirus infection in women in Turin, Italy. *Eur J Cancer* 2005;41(2):297-305.
- Rosler L, Reich O, Horvat R, De Souza SC, Holl K, Joura EA. Human papillomavirus in high-grade cervical lesions: Austrian data of a European multicentre study. *Wien Klin Wochenschr* 2013;125(19-20):591-9.
- Sandri MT, Riggio D, Salvatici M, Passerini R, Zorzino L, Boveri S, et al. Typing of human papillomavirus in women with cervical lesions: prevalence and distribution of different genotypes. *J Med Virol* 2009;81(2):271-7.
- Sargent A, Bailey A, Almonte M, Turner A, Thomson C, Peto J, et al. Prevalence of type-specific HPV infection by age and grade of cervical cytology: data from the ARTISTIC trial. *Br J Cancer* 2008;98(10):1704-9.
- Schmeink CE, Massuger LF, Lenselink CH, Quint WG, Witte BI, Berkhof J, et al. Prospective follow-up of 2,065 young unscreened women to study human papillomavirus incidence and clearance. *Int J Cancer* 2013;133(1):172-81.
- Schmitt M, Depuydt C, Benoy I, Bogers J, Antoine J, Arbyn M, et al. Prevalence and viral load of 51 genital human papillomavirus types and three subtypes. *Int J Cancer* 2013;132(10):2395-403.
- Shipitsyna E, Zolotoverkhaya E, Kuevda D, Nasonova V, Romanyuk T, Khachatryan A, et al. Prevalence of high-risk human papillomavirus types and cervical squamous intraepithelial lesions in women over 30 years of age in St. Petersburg, Russia. *Cancer Epidemiol* 2011;35(2):160-4.
- Sideri M, Cristoforoni P, Casadio C, Boveri S, Igdashian S, Schmitt M, et al. Distribution of human papillomavirus genotypes in invasive cervical cancer in Italy: a representative, single institution case series. *Vaccine* 2009;27 Suppl 1:A30-A33.
- Sigurdsson K, Taddeo FJ, Benediktsdottir KR, Olafsdottir K, Sigvaldason H, Oddsson K, et al. HPV genotypes in CIN 2-3 lesions and cervical cancer: a population-based study. *Int J Cancer* 2007;121(12):2682-7.
- Silins I, Wang X, Tadesse A, Jansen KU, Schiller JT, Avall-Lundqvist E, et al. A population-based study of cervical carcinoma and HPV infection in Latvia. *Gynecol Oncol* 2004;93(2):484-92.

- Silva J, Ribeiro J, Sousa H, Cerqueira F, Teixeira AL, Baldaque I, et al. Oncogenic HPV Types Infection in Adolescents and University Women from North Portugal: From Self-Sampling to Cancer Prevention. *J Oncol* 2011;2011:953469.
- Sjoeborg KD, Trope A, Lie AK, Jonassen CM, Steinbakk M, Hansen M, et al. HPV genotype distribution according to severity of cervical neoplasia. *Gynecol Oncol* 2010;118(1):29-34.
- Skapa P, Zamecnik J, Hamsikova E, Salakova M, Smahelova J, Jandova K, et al. Human papillomavirus (HPV) profiles of vulvar lesions: possible implications for the classification of vulvar squamous cell carcinoma precursors and for the efficacy of prophylactic HPV vaccination. *Am J Surg Pathol* 2007;31(12):1834-43.
- Soderlund-Strand A, Dillner J. High-throughput monitoring of human papillomavirus type distribution. *Cancer Epidemiol Biomarkers Prev* 2013;22(2):242-50.
- Soderlund-Strand A, Kjellberg L, Dillner J. Human papillomavirus type-specific persistence and recurrence after treatment for cervical dysplasia. *J Med Virol* 2014;86(4):634-41.
- Spinillo A, Dal Bello B, Alberizzi P, Cesari S, Gardella B, Roccio M, et al. Clustering patterns of human papillomavirus genotypes in multiple infections. *Virus Res* 2009;142(1-2):154-9.
- Spinillo A, Gardella B, Roccio M, Alberizzi P, Silini EM, Dal BB. Untypable human papillomavirus infection and risk of cervical intraepithelial neoplasia among women with abnormal cervical cytology. *J Med Virol* 2014;86(7):1145-52.
- Stamataki P, Papazafiropoulou A, Elefsiniotis I, Giannakopoulou M, Brokalaki H, Apostolopoulou E, et al. Prevalence of HPV infection among Greek women attending a gynecological outpatient clinic. *BMC Infect Dis* 2010;10:27.
- Stojanovic J, Magic Z, Milacic M, Nenadic D, Stanimirovic B, Vukicevic D. Distribution of high-risk HPV types in Yugoslav women with cervical neoplasia. *J BUON* 2002;7(3):251-6.
- Sundstrom K, Eloranta S, Sparen P, Arnheim DL, Gunnell A, Lindgren A, et al. Prospective study of human papillomavirus (HPV) types, HPV persistence, and risk of squamous cell carcinoma of the cervix. *Cancer Epidemiol Biomarkers Prev* 2010;19(10):2469-78.
- Szostek S, Klimek M, Zawilinska B, Kosz-Vnenchak M. Genotype-specific human papillomavirus detection in cervical smears. *Acta Biochim Pol* 2008;55(4):687-92.
- Tachezy R, Smahelova J, Salakova M, Arbyn M, Rob L, Skapa P, et al. Human papillomavirus genotype distribution in Czech women and men with diseases etiologically linked to HPV. *PLoS ONE* 2011;6(7):e21913.
- Tachezy R, Smahelova J, Kaspirkova J, Salakova M. Human papillomavirus type-specific prevalence in the cervical cancer screening population of Czech women. *PLoS One* 2013;8(11):e79156.
- Tamalet C, Richet H, Carcopino X, Henry M, Leretraite L, Heid P, et al. Testing for human papillomavirus and measurement of viral load of HPV 16 and 18 in self-collected vaginal swabs of women who do not undergo cervical cytological screening in Southern France. *J Med Virol* 2010;82(8):1431-7.
- Tamalet C, Le RL, Leandri FX, Heid P, Sancho GH, Piana L. Vaginal self-sampling is an adequate means of screening HR-HPV types in women not participating in regular cervical cancer screening. *Clin Microbiol Infect* 2013;19(1):E44-E50.

- Tempfer C, Grimm C, Harwanegg C, Huber M, Mueller MW, Buerkle B, et al. Frequency of 23 human papillomavirus types using DNA microarray in women with and without cytological anomalies. *Anticancer Research* 2007;27(3 B):1721-6.
- Tjalma WA, Fiander A, Reich O, Powell N, Nowakowski AM, Kirschner B, et al. Differences in human papillomavirus type distribution in high-grade cervical intraepithelial neoplasia and invasive cervical cancer in Europe. *Int J Cancer* 2013;132(4):854-67.
- Tornesello ML, Duraturo ML, Botti G, Greggi S, Piccoli R, De Palo G, et al. Prevalence of alpha-papillomavirus genotypes in cervical squamous intraepithelial lesions and invasive cervical carcinoma in the Italian population. *J Med Virol* 2006;78(12):1663-72.
- Tornesello ML, Cassese R, De RN, Buonaguro L, Masucci A, Vallefucio G, et al. High prevalence of human papillomavirus infection in Eastern European and West African women immigrants in South Italy. *APMIS* 2011;119(10):701-9.
- Tornesello ML, Losito S, Benincasa G, Fulciniti F, Botti G, Greggi S, et al. Human papillomavirus (HPV) genotypes and HPV16 variants and risk of adenocarcinoma and squamous cell carcinoma of the cervix. *Gynecol Oncol* 2011;121(1):32-42.
- Tsimplaki E, Argyri E, Michala L, Kouvoussi M, Apostolaki A, Magiakos G, et al. Human papillomavirus genotyping and e6/e7 mRNA expression in greek women with intraepithelial neoplasia and squamous cell carcinoma of the vagina and vulva. *J Oncol* 2012;2012:893275.
- Tsiodras S, Georgoulakis J, Chranioti A, Voulgaris Z, Psyrris A, Tsvilika A, et al. Hybrid Capture vs. PCR screening of Cervical Human Papilloma Virus Infections. Cytological and Histological associations in 1270 women. *BMC Cancer* 2010;10(1):53.
- Tsiodras S, Hatzakis A, Spathis A, Margari N, Meristoudis C, Chranioti A, et al. Molecular epidemiology of HPV infection using a clinical array methodology in 2952 women in Greece. *Clin Microbiol Infect* 2011;17(8):1185-8.
- Ucakar V, Poljak M, Klavs I. Pre-vaccination prevalence and distribution of high-risk human papillomavirus (HPV) types in Slovenian women: a cervical cancer screening based study. *Vaccine* 2012;30(2):116-20.
- Uuskula A, Kals M, Kosenkranius L, McNutt LA, Dehovitz J. Population-based type-specific prevalence of high-risk human papillomavirus infection in Estonia. *BMC Infect Dis* 2010;10(1):63.
- van der Avoort I, Shirango H, Hoevenaars BM, Grefte JM, de Hullu JA, de Wilde PC, et al. Vulvar squamous cell carcinoma is a multifactorial disease following two separate and independent pathways. *Int J Gynecol Pathol* 2006;25(1):22-9.
- van Esch EM, Dam MC, Osse ME, Putter H, Trimbos BJ, Fleuren G, et al. Clinical characteristics associated with development of recurrence and progression in usual-type vulvar intraepithelial neoplasia. *Int J Gynecol Cancer* 2013;23(8):1476-83.
- Van Seters M, ten Kate FJ, Van Beurden M, Verheijen RH, Meijer CJ, Burger MP, et al. In the absence of (early) invasive carcinoma, vulvar intraepithelial neoplasia associated with lichen sclerosus is mainly of undifferentiated type: new insights in histology and aetiology. *J Clin Pathol* 2007;60(5):504-9.
- Van Seters M, Beckmann I, Heijmans-Antonissen C, van BM, Ewing PC, Zijlstra FJ, et al. Disturbed patterns of immunocompetent cells in usual-type vulvar intraepithelial neoplasia. *Cancer Res* 2008;68(16):6617-22.

- Vaucel E, Coste-Burel M, Laboisse C, Dahlab A, Lopes P. Human papillomavirus genotype distribution in cervical samples collected in routine clinical practice at the Nantes University Hospital, France. *Arch Gynecol Obstet* 2011;284(4):989-98.
- Venturoli S, Ambretti S, Cricca M, Leo E, Costa S, Musiani M, et al. Correlation of high-risk human papillomavirus genotypes persistence and risk of residual or recurrent cervical disease after surgical treatment. *J Med Virol* 2008;80(8):1434-40.
- Verteramo R, Pierangeli A, Calzolari E, Patella A, Recine N, Mancini E, et al. Direct sequencing of HPV DNA detected in gynaecologic outpatients in Rome, Italy. *Microbes Infect* 2006;8(9-10):2517-21.
- Verteramo R, Pierangeli A, Mancini E, Calzolari E, Bucci M, Osborn J, et al. Human Papillomaviruses and genital co-infections in gynaecological outpatients. *BMC Infect Dis* 2009;12(9):16.
- Vieira L, Almeida A. The cytology and DNA detection by the PapilloCheck((R)) test in the diagnosis of human papillomavirus infection. *Eur J Microbiol Immunol (Bp)* 2013;3(1):61-7.
- Vujosevic D, Vuksanovic V, Poljak M, Jokmanovic N. Human papillomavirus genotype spectrum in studied group of Montenegrin women. *Acta Medica (Hradec Kralove)* 2012;55(3):130-2.
- Weyn C, Garbar C, Noel JC, Weynand B, Verhest A, d'Oline D, et al. Inter-laboratory variability in the presence of human papillomavirus in normal and abnormal cervical cytology samples. *Cancer Epidemiol* 2013;37(4):457-61.
- Widschwendter A, Blassnig A, Wiedemair A, Muller-Holzner E, Muller HM, Marth C. Human papillomavirus DNA in sera of cervical cancer patients as tumor marker. *Cancer Lett* 2003;202(2):231-9.
- Woodman CB, Collins S, Winter H, Bailey A, Ellis J, Prior P, et al. Natural history of cervical human papillomavirus infection in young women: a longitudinal cohort study. *Lancet* 2001;357(9271):1831-6.
- Zappacosta B, Romano L, Guerriero M, Graziano M, Vitrani A, De Ninno M, et al. Detection of 14 human papillomavirus genotypes in cervical samples in women from a central-southern area of Italy showing different Pap test results. *New Microbiol* 2009;32(4):351-8.
- Zielinski GD, Snijders PJ, Rozendaal L, Daalmeijer NF, Risse EK, Voorhorst FJ, et al. The presence of high-risk HPV combined with specific p53 and p16INK4a expression patterns points to high-risk HPV as the main causative agent for adenocarcinoma in situ and adenocarcinoma of the cervix. *J Pathol* 2003;201(4):535-43.

#### **1.4 Latin America and the Caribbean**

- Afonso LA, Rocha WM, Carestiato FN, Dobao EA, Pesca LF, Passos MR, et al. Human papillomavirus infection among sexual partners attending a Sexually Transmitted Disease Clinic in Rio de Janeiro, Brazil. *Braz J Med Biol Res* 2013;46(6):533-8.
- Alonio LV, Picconi MA, Dalbert D, Mural J, Bartt O, Bazan G, et al. Ha-ras oncogene mutation associated to progression of papillomavirus induced lesions of uterine cervix. *J Clin Virol* 2003;27(3):263-9.
- Amaro-Filho SM, Golub JE, Nuovo GJ, Cunha CB, Levi JE, Villa LL, et al. A comparative analysis of clinical and molecular factors with the stage of cervical cancer in a Brazilian cohort. *PLoS One* 2013;8(3):e57810.

- Amaro Filho SM, Nuovo GJ, Cunha CB, Pereira LD, Oliveira-Silva M, Russomano F, et al. Correlation of MCM2 detection with stage and virology of cervical cancer. *Int J Biol Markers* 2014;29(4):e363-71.
- Andall-Brereton GM, Hosein F, Salas RA, Mohammed W, Monteil MA, Goleski V, et al. Human papillomavirus genotypes and their prevalence in a cohort of women in Trinidad. *Rev Panam Salud Publica* 2011;29(4):220-6.
- Badano I, Pedrozo RW, Ruiz Diaz LS, Galuppo JA, Picconi MA, Campos RH, et al. Human papillomavirus (HPV) detection and Papanicolaou cytology in low-resource women in Posadas city, Misiones, Argentina. *Rev Argent Microbiol* 2011;43(4):263-7.
- Barr E, Gause CK, Bautista OM, Railkar RA, Lupinacci LC, Insinga RP, et al. Impact of a prophylactic quadrivalent human papillomavirus (types 6, 11, 16, 18) L1 virus-like particle vaccine in a sexually active population of North American women. *Am J Obstet Gynecol* 2008;198(3):261-11.
- Bedoya AM, Jaramillo R, Baena A, Castano J, Olaya N, Zea AH, et al. Location and density of immune cells in precursor lesions and cervical cancer. *Cancer Microenvironment* 2013;6(1):69-77.
- Berois N, De CP, Mazal D, Sica A, Cedeira M, Caserta B, et al. Prevalence and distribution of high-risk human papillomavirus genotypes in invasive carcinoma of the uterine cervix in Uruguay. *Int J Gynecol Cancer* 2013;23(3):527-32.
- Berois N, Heard I, Fort Z, Alonso R, Sica A, Moerzinger P, et al. Prevalence of type-specific HPV infection in Uruguay. *J Med Virol* 2014;86(4):647-52.
- Brown CR, Leon ML, Munoz K, Fagioni A, Amador LG, Frain B, et al. Human papillomavirus infection and its association with cervical dysplasia in Ecuadorian women attending a private cancer screening clinic. *Braz J Med Biol Res* 2009;42(7):629-36.
- Camargo M, Soto-De Leon SC, Sanchez R, Perez-Prados A, Patarroyo ME, Patarroyo MA. Frequency of human papillomavirus infection, coinfection, and association with different risk factors in Colombia. *Ann Epidemiol* 2011;21(3):204-13.
- Canche JC, Lopez IR, Suarez NG, Acosta GC, Conde-Ferraez L, Cetina TC, et al. High prevalence and low E6 genetic variability of human papillomavirus 58 in women with cervical cancer and precursor lesions in Southeast Mexico. *Mem Inst Oswaldo Cruz* 2010;105(2):144-8.
- Cathro HP, Loya T, Dominguez F, Howe SL, Howell R, Orndorff K, et al. Human papillomavirus profile of women in Belize City, Belize: correlation with cervical cytopathologic findings. *Hum Pathol* 2009;40(7):942-9.
- Cavalcanti SM, Zardo LG, Passos MR, Oliveira LH. Epidemiological aspects of human papillomavirus infection and cervical cancer in Brazil. *J Infect* 2000;40(1):80-7.
- Cecchini G, Paganini G, D'Amico M, Cannone M, Bertuletti C, Barberis MC. Cervical cancer screening programs in low-income communities. Experiences from Ecuador. Low cost detection of HPV infection in a developing country. *Pathologica* 2009;101(2):76-9.
- Chouhy D, Gil LB, Nocito AL, Wojdyla D, Ornella L, Cittadini J, et al. Development and evaluation of a colorimetric PCR system for the detection and typing of human papillomaviruses. *Int J Mol Med* 2006;18(5):995-1003.
- Chouhy D, D'Andrea RM, Iglesias M, Messina A, Ivancovich JJ, Cerda B, et al. Prevalence of human papillomavirus infection in Argentinean women attending two different hospitals prior to the implementation of the National Vaccination Program. *J Med Virol* 2013;85(4):655-66.

- Ciapponi A, Bardach A, Glujovsky D, Gibbons L, Picconi MA. Type-specific HPV prevalence in cervical cancer and high-grade lesions in Latin America and the Caribbean: systematic review and meta-analysis. *PLoS ONE* 2011;6(10):e25493.
- Clarke M, Schiffman M, Wacholder S, Rodriguez AC, Hildesheim A, Quint W. A prospective study of absolute risk and determinants of human papillomavirus incidence among young women in Costa Rica. *BMC Infect Dis* 2013;13:308.
- Correnti M, Medina F, Cavazza ME, Rennola A, Avila M, Fernandes A. Human papillomavirus (HPV) type distribution in cervical carcinoma, low-grade, and high-grade squamous intraepithelial lesions in Venezuelan women. *Gynecol Oncol* 2011;121(3):527-31.
- Coser J, da Rocha BT, Simon D, Kazantzi Fonseca AS, Ikuta N, Lunge VR. Prevalence and genotypic diversity of cervical human papillomavirus infection among women from an urban center in Brazil. *Genet Mol Res* 2013;12(4):4276-85.
- da Silva MC, Martins HP, de Souza JL, Tognim MC, Svidzinski TI, Teixeira JJ, et al. Prevalence of HPV infection and genotypes in women with normal cervical cytology in the state of Parana, Brazil. *Arch Gynecol Obstet* 2012;286(4):1015-22.
- da Silva Barros NK, Costa MC, Alves RR, Villa LL, Derchain SF, Zeferino LC, et al. Association of HPV infection and Chlamydia trachomatis seropositivity in cases of cervical neoplasia in Midwest Brazil. *J Med Virol* 2012;84(7):1143-50.
- de Almeida FG, Machado AP, Fernandes CE, Ferreira AT, Padovani CT, Tozetti IA. Molecular epidemiology of the human papillomavirus infection in self-collected samples from young women. *J Med Virol* 2014;86(2):266-71.
- de Oliveira CM, Fregnani JH, Carvalho JP, Longatto-Filho A, Levi JE. Human papillomavirus genotypes distribution in 175 invasive cervical cancer cases from Brazil. *BMC Cancer* 2013;13:357.
- Deluca GD, Basiletti J, Schelover E, Vasquez ND, Alonso JM, Marin HM, et al. Chlamydia trachomatis as a probable cofactor in human papillomavirus infection in aboriginal women from northeastern Argentina. *Braz J Infect Dis* 2011;15(6):567-72.
- Deluca GD, Basiletti J, Gonzalez JV, Diaz VN, Lucero RH, Picconi MA. Human papilloma virus risk factors for infection and genotype distribution in aboriginal women from Northern Argentina. *Medicina (B Aires)* 2012;72(6):461-6.
- Fernandes J, Carvalho M, de FT, Araujo J, Azevedo P, Azevedo J, et al. Prevalence of human papillomavirus type 58 in women with or without cervical lesions in northeast Brazil. *Ann Med Health Sci Res* 2013;3(4):504-10.
- Fernandes JV. Prevalence of HPV infection by cervical cytologic status in Brazil. *Int J Gynaecol Obstet* 2009;105(1):21-4.
- Fernandes JV, Meissner RV, Carvalho MG, Fernandes TA, Azevedo PR, Sobrinho JS, et al. Prevalence of human papillomavirus in archival samples obtained from patients with cervical pre-malignant and malignant lesions from Northeast Brazil. *BMC Res Notes* 2010;3(1):96.
- Fernandes JV, Meissner R, V, Carvalho MG, Fernandes TA, Azevedo PR, de Azevedo JW, et al. Human papillomavirus prevalence in women with normal cytology and with cervical cancer in Natal, Brazil. *Mol Med Report* 2011;4(6):1321-6.

- Fernandez-Tilapa G, I. Prevalence of human papillomavirus types among Mexican women with intraepithelial lesions and cervical cancer: Detection with MY09/MY011 and GP5+/GP6+ primer systems. *American Journal of Infectious Diseases* 2007;3(2):62-7.
- Ferreccio C, Prado RB, Luzoro AV, Ampuero SL, Snijders PJ, Meijer CJ, et al. Population-based prevalence and age distribution of human papillomavirus among women in Santiago, Chile. *Cancer Epidemiol Biomarkers Prev* 2004;13(12):2271-6.
- Ferreccio C, Corvalan A, Margozzini P, Viviani P, Gonzalez C, Aguilera X, et al. Baseline assessment of prevalence and geographical distribution of HPV types in Chile using self-collected vaginal samples. *BMC Public Health* 2008;8:78.
- Ferrera A, Tabora N, Flores Y, Zelaya A, Massuger L, Melchers WJ. Assessment of HPV infection among female university students in Honduras via Roche linear array. *Int J Gynaecol Obstet* 2011;113(2):96-9.
- Figueiredo Alves RR, Turchi MD, Santos LE, Guimaraes EM, Garcia MM, Seixas MS, et al. Prevalence, genotype profile and risk factors for multiple human papillomavirus cervical infection in unimmunized female adolescents in Goiania, Brazil: a community-based study. *BMC Public Health* 2013;13(1):1041.
- Garcia DA, Cid-Arregui A, Schmitt M, Castillo M, Briceno I, Aristizabal FA. Highly sensitive detection and genotyping of HPV by PCR multiplex and Luminex technology in a cohort of Colombian women with abnormal cytology. *Open Virol J* 2011;5:70-9.
- Garcia DA, Briceno I, Castillo M, Aristizabal FA. Detection of gene amplification in MYCN, C-MYC, MYCL1, ERBB2, EGFR, AKT2, and human papilloma virus in samples from cervical smear normal cytology, intraepithelial cervical neoplasia (CIN I, II, III), and cervical cancer. *Colombia Medica* 2011;42(2):144-53.
- Giuliano AR, Papenfuss M, Abrahamsen M, Denman C, de Zapien JG, Henze JL, et al. Human papillomavirus infection at the United States-Mexico border: implications for cervical cancer prevention and control. *Cancer Epidemiol Biomarkers Prev* 2001;10(11):1129-36.
- Golijow CD, Abba MC, Mouron SA, Laguens RM, Dulout FN, Smith JS. Chlamydia trachomatis and Human papillomavirus infections in cervical disease in Argentine women. *Gynecol Oncol* 2005;96(1):181-6.
- Gonzalez-Losa MdR, Rosado-Lopez I, Valdez-Gonzalez N, Puerto-Solis M. High prevalence of human papillomavirus type 58 in Mexican colposcopy patients. *J Clin Virol* 2004;29(3):202-5.
- Herrero R, Hildesheim A, Bratti C, Sherman ME, Hutchinson M, Morales J, et al. Population-based study of human papillomavirus infection and cervical neoplasia in rural Costa Rica. *J Natl Cancer Inst* 2000;92(6):464-74.
- Herrero R, Castle PE, Schiffman M, Bratti MC, Hildesheim A, Morales J, et al. Epidemiologic profile of type-specific human papillomavirus infection and cervical neoplasia in Guanacaste, Costa Rica. *J Infect Dis* 2005;191(11):1796-807.
- Hindryckx P, Garcia A, Claeys P, Gonzalez C, Velasquez R, Bogers J, et al. Prevalence of high risk human papillomavirus types among Nicaraguan women with histological proved pre-neoplastic and neoplastic lesions of the cervix. *Sex Transm Infect* 2006;82(4):334-6.
- Hosein F, Mohammed W, Zubach V, Legall G, Severini A. Human papillomavirus genotypes in invasive cervical squamous cell carcinoma in Trinidad. *Rev Panam Salud Publica* 2013;33(4):267-70.



- Ili CG, Brebi P, Lopez J, Garcia P, Leal P, Suarez E, et al. Genotyping of human papillomavirus in cervical intraepithelial neoplasia in a high-risk population. *J Med Virol* 2011;83(5):833-7.
- Illades-Aguilar B, Cortes-Malagon EM, Antonio-Vejar V, Zamudio-Lopez N, Alarcon-Romero LC, Fernandez-Tilapa G, et al. Cervical carcinoma in Southern Mexico: Human papillomavirus and cofactors. *Cancer Detect Prev* 2009;32(4):300-7.
- Illades-Aguilar B, Alarcon-Romero LD, Antonio-Vejar V, Zamudio-Lopez N, Sales-Linares N, Flores-Alfaro E, et al. Prevalence and distribution of human papillomavirus types in cervical cancer, squamous intraepithelial lesions, and with no intraepithelial lesions in women from Southern Mexico. *Gynecol Oncol* 2010;117(2):291-6.
- Kasamatsu E, Cubilla AL, Alemany L, Chaux A, Tous S, Mendoza L, et al. Type-specific human papillomavirus distribution in invasive cervical carcinomas in Paraguay. A study of 432 cases. *J Med Virol* 2012;84(10):1628-35.
- Kightlinger RS, Irvin WP, Archer KJ, Huang NW, Wilson RA, Doran JR, et al. Cervical cancer and human papillomavirus in indigenous Guyanese women. *Am J Obstet Gynecol* 2010;202(6):626-7.
- Krambeck WM, Cadide RM, Dalmarco EM, de Cordova CM. HPV detection and genotyping as an earlier approach in cervical cancer screening of the female genital tract. *Clin Exp Obstet Gynecol* 2008;35(3):175-8.
- Lavorato-Rocha AM, de Melo MB, Rodrigues IS, Stiepcich MM, Baiocchi G, da Silva Cestari FM, et al. Prognostication of vulvar cancer based on p14ARF status: molecular assessment of transcript and protein. *Ann Surg Oncol* 2013;20(1):31-9.
- Lazcano-Ponce E, Herrero R, Munoz N, Cruz A, Shah KV, Alonso P, et al. Epidemiology of HPV infection among Mexican women with normal cervical cytology. *Int J Cancer* 2001;91(3):412-20.
- Lewis-Bell K, Luciani S, Unger ER, Hariri S, McFarlane S, Steinau M, et al. Genital human papillomaviruses among women of reproductive age in Jamaica. *Rev Panam Salud Publica* 2013;33(3):159-65.
- Lippman SA, Sucupira MC, Jones HE, Luppi CG, Palefsky J, van de Wijgert JH, et al. Prevalence, distribution and correlates of endocervical human papillomavirus types in Brazilian women. *Int J STD AIDS* 2010;21(2):105-9.
- Lopez-Revilla R, Martinez-Contreras LA, Sanchez-Garza M. Prevalence of high-risk human papillomavirus types in Mexican women with cervical intraepithelial neoplasia and invasive carcinoma. *Infect Agent Cancer* 2008;3(1):3.
- Lorenzato F, Ho L, Terry G, Singer A, Santos LC, De Lucena BR, et al. The use of human papillomavirus typing in detection of cervical neoplasia in Recife (Brazil). *Int J Gynecol Cancer* 2000;10(2):143-50.
- Lorenzato FR, Singer A, Ho L, Santos LC, Batista RL, Lubambo TM, et al. Human papillomavirus detection for cervical cancer prevention with polymerase chain reaction in self-collected samples. *Am J Obstet Gynecol* 2002;186(5):962-8.
- Martorell M, Garcia-Garcia JA, Gomez-Cabrero D, Del AA. Comparison of the prevalence and distribution of human papillomavirus infection and cervical lesions between urban and native inhabitants of an Amazonian region of Peru. *Genet Mol Res* 2012;11(3):2099-106.

- Matos E, Loria D, Amestoy GM, Herrera L, Prince MA, Moreno J, et al. Prevalence of human papillomavirus infection among women in Concordia, Argentina: a population-based study. *Sex Transm Dis* 2003;30(8):593-9.
- Mendez K, Romaguera J, Perez CM, Soto-Salgado M, Tortolero-Luna G, Palefsky JM, et al. Cervical human papillomavirus infection in a sample of Hispanic women living in Puerto Rico: comparison with cervical cytology reports. *P R Health Sci J* 2013;32(1):3-7.
- Mendoza LP, Arbiza J, Paez M, Kasamatsu E, Castro A, Gimenez G, et al. Distribution of human papillomavirus genotypes in Paraguayan women according to the severity of the cervical lesion. *J Med Virol* 2011;83(8):1351-7.
- Michelli E, Tellez L, Mendoza JA, Noguera ME, Milano M, Vera R, et al. Amplification of human papillomavirus early genes for detection of nine genotypes in Venezuelan women. *Invest Clin* 2013;54(4):392-405.
- Miranda PM, Pitol BC, Moran MS, Silva NN, Felix PM, Lima-Filho JL, et al. Human papillomavirus infection in Brazilian women with normal cervical cytology. *Genet Mol Res* 2012;11(2):1752-61.
- Molano M, Posso H, Weiderpass E, van den Brule AJ, Ronderos M, Franceschi S, et al. Prevalence and determinants of HPV infection among Colombian women with normal cytology. *Br J Cancer* 2002;87(3):324-33.
- Molano M, van den Brule AJ, Posso H, Weiderpass E, Ronderos M, Franceschi S, et al. Low grade squamous intra-epithelial lesions and human papillomavirus infection in Colombian women. *Br J Cancer* 2002;87(12):1417-21.
- Molano M, Acosta PM, Bravo MM. Types and variants of human papillomavirus in patients with cervical cancer submitted to radiotherapy. *Biosalud* 2007;6:45-57.
- Montalvo MT, Lobato I, Villanueva H, Borquez C, Navarrete D, Abarca J, et al. Prevalence of human papillomavirus in university young women. *Oncol Lett* 2011;2(4):701-6.
- Munoz N, Mendez F, Posso H, Molano M, van den Brule AJ, Ronderos M, et al. Incidence, duration, and determinants of cervical human papillomavirus infection in a cohort of Colombian women with normal cytological results. *J Infect Dis* 2004;190(12):2077-87.
- Murillo R, Molano M, Martinez G, Mejia JC, Gamboa O. HPV prevalence in Colombian women with cervical cancer: implications for vaccination in a developing country. *Infect Dis Obstet Gynecol* 2009;2009:653598.
- Oliveira FA, Ehrig V, Lang K, Heukelbach J, Stoffler-Meilicke M, Ignatius R, et al. Human papillomavirus genotype distribution and risk factors for infection in women from a small municipality in north east Brazil. *Int J STD AIDS* 2012;23(9):e5-10.
- Oliveira LH, Ferreira MD, Augusto EF, Melgaco FG, Santos LS, Cavalcanti SM, et al. Human papillomavirus genotypes in asymptomatic young women from public schools in Rio de Janeiro, Brazil. *Rev Soc Bras Med Trop* 2010;43(1):4-8.
- Orozco-Colin A, Carrillo-Garcia A, Mendez-Tenorio A, Ponce-de-Leon S, Mohar A, Maldonado-Rodriguez R, et al. Geographical variation in human papillomavirus prevalence in Mexican women with normal cytology. *Int J Infect Dis* 2010;14(12):e1082-e1087.

- Ortiz AP, Romaguera J, Perez CM, Otero Y, Soto-Salgado M, Mendez K, et al. Human papillomavirus infection in women in Puerto Rico: agreement between physician-collected and self-collected anogenital specimens. *J Low Genit Tract Dis* 2013;17(2):210-7.
- Parada R, Morales R, Giuliano AR, Cruz A, Castellsague X, Lazcano-Ponce E. Prevalence, concordance and determinants of human papillomavirus infection among heterosexual partners in a rural region in central Mexico. *BMC Infect Dis* 2010;10:223.
- Peralta-Rodriguez R, Romero-Morelos P, Villegas-Ruiz V, Mendoza-Rodriguez M, Taniguchi-Ponciano K, Gonzalez-Yebra B, et al. Prevalence of human papillomavirus in the cervical epithelium of Mexican women: meta-analysis. *Infect Agent Cancer* 2012;7(1):34.
- Pereira CR, Rosa ML, Vasconcelos GA, Faria PC, Cavalcanti SM, Oliveira LH. Human papillomavirus prevalence and predictors for cervical cancer among high-risk women from Rio de Janeiro, Brazil. *Int J Gynecol Cancer* 2007;17(3):651-60.
- Perez LO, Crivaro A, Barbisan G, Poleri L, Golijow CD. XRCC2 R188H (rs3218536), XRCC3 T241M (rs861539) and R243H (rs77381814) single nucleotide polymorphisms in cervical cancer risk. *Pathol Oncol Res* 2013;19(3):553-8.
- Pina-Sanchez P, Hernandez-Hernandez DM, Lopez-Romero R, Vazquez-Ortiz G, Perez-Plasencia C, Lizano-Soberon M, et al. Human papillomavirus-specific viral types are common in Mexican women affected by cervical lesions. *Int J Gynecol Cancer* 2006;16(3):1041-7.
- Pinto AP, Schlecht NF, Pintos J, Kaiano J, Franco EL, Crum CP, et al. Prognostic significance of lymph node variables and human papillomavirus DNA in invasive vulvar carcinoma. *Gynecol Oncol* 2004;92(3):856-65.
- Pitta DR, Sarian LO, Campos EA, Rabelo-Santos SH, Syrjanen K, Derchain SF. Phylogenetic classification of human papillomavirus genotypes in high-grade cervical intraepithelial neoplasia in women from a densely populated Brazilian urban region. *Sao Paulo Med J* 2009;127(3):122-7.
- Rabelo-Santos SH, Zeferino L, Villa LL, Sobrinho JP, Amaral RG, Magalhaes AV. Human papillomavirus prevalence among women with cervical intraepithelial neoplasia III and invasive cervical cancer from Goiania, Brazil. *Mem Inst Oswaldo Cruz* 2003;98(2):181-4.
- Ragin CC, Wheeler VW, Wilson JB, Bunker CH, Gollin SM, Patrick AL, et al. Distinct distribution of HPV types among cancer-free Afro-Caribbean women from Tobago. *Biomarkers* 2007;12(5):510-22.
- Ramas V, Mirazo S, Bonilla S, Mendoza L, Lago O, Basiletti J, et al. Human papillomavirus genotypes distribution in cervical samples from Uruguayan women. *J Med Virol* 2013;85(5):845-51.
- Resende LS, Rabelo-Santos SH, Sarian LO, Alves RR, Ribeiro AA, Zeferino LC, et al. A portrait of single and multiple HPV type infections in Brazilian women of different age strata with squamous or glandular cervical lesions. *BMC Infect Dis* 2014;14(1):214.
- Ribeiro AA, Figueiredo Alves RR, Costa MC, Villa LL, Zeferino LC, Mauricette Derchain SF, et al. Association between HPV types and species groups and cervical neoplasia from a high-risk area for cervical cancer, Goiania, Brazil. *Int J Gynecol Pathol* 2011;30(3):288-94.
- Roa JC, Garcia P, Gomez J, Fernandez W, Gaete F, Espinoza A, et al. HPV genotyping from invasive cervical cancer in Chile. *Int J Gynaecol Obstet* 2009;105(2):150-3.
- Rolon PA, Smith JS, Munoz N, Klug SJ, Herrero R, Bosch X, et al. Human papillomavirus infection and invasive cervical cancer in Paraguay. *Int J Cancer* 2000;85(4):486-91.

- Rosa MI, Fachel JM, Rosa DD, Medeiros LR, Igansi CN, Bozzetti MC. Persistence and clearance of human papillomavirus infection: a prospective cohort study. *Am J Obstet Gynecol* 2008;199(6):617.
- Roteli-Martins CM, De Carvalho NS, Naud P, Teixeira J, Borba P, Derchain S, et al. Prevalence of human papillomavirus infection and associated risk factors in young women in Brazil, Canada, and the United States: a multicenter cross-sectional study. *Int J Gynecol Pathol* 2011;30(2):173-84.
- Safaeian M, Herrero R, Hildesheim A, Quint W, Freer E, Van Doorn LJ, et al. Comparison of the SPF10-LiPA system to the Hybrid Capture 2 Assay for detection of carcinogenic human papillomavirus genotypes among 5,683 young women in Guanacaste, Costa Rica. *J Clin Microbiol* 2007;45(5):1447-54.
- Sanchez-Anguiano LF, Alvarado-Esquivel C, Reyes-Romero MA, Carrera-Rodriguez M. Human papillomavirus infections in women seeking cervical Papanicolaou cytology of Durango, Mexico: prevalence and genotypes. *BMC Infect Dis* 2006;6:27.
- Sanchez-Lander J, Cortinas P, Loureiro CL, Pujol FH, Medina F, Capote-Negrin L, et al. Human papillomavirus in invasive cervical cancer and cervical intraepithelial neoplasia 2 and 3 in Venezuela: a cross-sectional study. *Cancer Epidemiol* 2012;36(5):e284-e287.
- Santos C, Munoz N, Klug S, Almonte M, Guerrero I, Alvarez M, et al. HPV types and cofactors causing cervical cancer in Peru. *Br J Cancer* 2001;85(7):966-71.
- Soto Y, Mune M, Morales E, Goicolea A, Mora J, Sanchez L, et al. Human papillomavirus infections in Cuban women with cervical intraepithelial neoplasia. *Sex Transm Dis* 2007;34(12):974-6.
- Soto Y, Torres G, Kouri V, Limia CM, Goicolea A, Capo V, et al. Molecular epidemiology of human papillomavirus infections in cervical samples from Cuban women older than 30 years. *J Low Genit Tract Dis* 2014;18(3):210-7.
- Soto-De Leon SC, Camargo M, Sanchez R, Leon S, Urquiza M, Acosta J, et al. Prevalence of infection with high-risk human papillomavirus in women in Colombia. *Clinical Microbiology & Infection* 2009;15(1):100-2.
- Tabora N, Bakkers JM, Quint WG, Massuger LF, Matute JA, Melchers WJ, et al. Human papillomavirus infection in Honduran women with normal cytology. *Cancer Causes Control* 2009;20(9):1663-70.
- Tabora N, Bulnes R, Toro LA, Claros JM, Massuger LF, Quint WG, et al. Human papillomavirus infection in Honduran women with cervical intraepithelial neoplasia or cervical cancer. *J Low Genit Tract Dis* 2011;15(1):48-53.
- Tavares MC, de Macedo JL, de Lima Junior SF, de Andrade HS, Amorim MM, de Mascena Diniz MM, et al. Chlamydia trachomatis infection and human papillomavirus in women with cervical neoplasia in Pernambuco-Brazil. *Mol Biol Rep* 2014;41(2):865-74.
- Trottier H, Mahmud S, Prado JC, Sobrinho JS, Costa MC, Rohan TE, et al. Type-specific duration of human papillomavirus infection: implications for human papillomavirus screening and vaccination. *J Infect Dis* 2008;197(10):1436-47.
- Valles X, Murga GB, Hernandez G, Sabido M, Chuy A, Lloveras B, et al. High prevalence of human papillomavirus infection in the female population of Guatemala. *Int J Cancer* 2009;125(5):1161-7.

Walmer DK, Eder PS, Bell L, Salim H, Kobayashi L, Ndirangu J, et al. Human papillomavirus prevalence in a population of women living in Port-au-Prince and Leogane, Haiti. *PLoS One* 2013;8(10):e76110.

### 1.5 Northern America

Antonishyn NA, Horsman GB, Kelln RA, Saggar J, Severini A. The impact of the distribution of human papillomavirus types and associated high-risk lesions in a colposcopy population for monitoring vaccine efficacy. *Arch Pathol Lab Med* 2008;132(1):54-60.

Banister CE, Messersmith AR, Chakraborty H, Wang Y, Spirya LB, Glover SH, et al. HPV prevalence at enrollment and baseline results from the Carolina Women's Care Study, a longitudinal study of HPV persistence in women of college age. *Int J Womens Health* 2013;5:379-88.

Barr E, Gause CK, Bautista OM, Railkar RA, Lupinacci LC, Insinga RP, et al. Impact of a prophylactic quadrivalent human papillomavirus (types 6, 11, 16, 18) L1 virus-like particle vaccine in a sexually active population of North American women. *Am J Obstet Gynecol* 2008;198(3):261-11.

Castle PE, Schiffman M, Wheeler CM, Wentzensen N, Gravitt PE. Human papillomavirus genotypes in cervical intraepithelial neoplasia grade 3. *Cancer Epidemiol Biomarkers Prev* 2010;19(7):1675-81.

Castle PE, Shaber R, Lamere B, Kinney W, Fetterman B, Poitras N, et al. Human papillomavirus (HPV) genotypes in women with cervical precancer and cancer at Kaiser Permanente Northern California. *Cancer Epidemiol Biomarkers Prev* 2011;20(5):946-53.

Chaturvedi AK, Dumestre J, Gaffga AM, Mire KM, Clark RA, Braly PS, et al. Prevalence of human papillomavirus genotypes in women from three clinical settings. *J Med Virol* 2005;75(1):105-13.

Cibas ES, Hong X, Crum CP, Feldman S. Age-specific detection of high risk HPV DNA in cytologically normal, computer-imaged ThinPrep Pap samples. *Gynecol Oncol* 2007;104(3):702-6.

Coutlee F, Ratnam S, Ramanakumar AV, Insinga RR, Bentley J, Escott N, et al. Distribution of human papillomavirus genotypes in cervical intraepithelial neoplasia and invasive cervical cancer in Canada. *J Med Virol* 2011;83(6):1034-41.

Crum CP, Beach KJ, Hedley ML, Yuan L, Lee KR, Wright TC, et al. Dynamics of human papillomavirus infection between biopsy and excision of cervical intraepithelial neoplasia: results from the ZYC101a protocol. *J Infect Dis* 2004;189(8):1348-54.

Daling JR, Madeleine MM, Schwartz SM, Shera KA, Carter JJ, McKnight B, et al. A population-based study of squamous cell vaginal cancer: HPV and cofactors. *Gynecol Oncol* 2002;84(2):263-70.

de Koning MN, Quint WG, Pirog EC. Prevalence of mucosal and cutaneous human papillomaviruses in different histologic subtypes of vulvar carcinoma. *Mod Pathol* 2008;21(3):334-44.

Demers AA, Shearer B, Severini A, Lotocki R, Kliewer EV, Stopera S, et al. Distribution of human papillomavirus types, cervical cancer screening history, and risk factors for infection in Manitoba. *Chronic Dis Inj Can* 2012;32(4):177-85.

Dunne EF, Unger ER, Sternberg M, McQuillan G, Swan DC, Patel SS, et al. Prevalence of HPV infection among females in the United States. *JAMA* 2007;297(8):813-9.

Evans MF, Adamson CS, Papillo JL, St John TL, Leiman G, Cooper K. Distribution of human papillomavirus types in ThinPrep Papanicolaou tests classified according to the Bethesda 2001 terminology and correlations with patient age and biopsy outcomes. *Cancer* 2006;106(5):1054-64.

- Evans MF, Peng Z, Clark KM, Adamson CS, Ma XJ, Wu X, et al. HPV E6/E7 RNA in situ hybridization signal patterns as biomarkers of three-tier cervical intraepithelial neoplasia grade. *PLoS One* 2014;9(3):e91142.
- Gaffga NH, Flagg EW, Weinstock HS, Shlay JC, Ghanem KG, Koutsky LA, et al. Monitoring HPV type-specific prevalence over time through clinic-based surveillance: a perspective on vaccine effectiveness. *Vaccine* 2012;30(11):1959-64.
- Gargano JW, Nisenbaum R, Lee DR, Ruffin MT, Steinau M, Horowitz IR, et al. Age-group differences in human papillomavirus types and cofactors for cervical intraepithelial neoplasia 3 among women referred to colposcopy. *Cancer Epidemiol Biomarkers Prev* 2012;21(1):111-21.
- Gargano JW, Wilkinson EJ, Unger ER, Steinau M, Watson M, Huang Y, et al. Prevalence of human papillomavirus types in invasive vulvar cancers and vulvar intraepithelial neoplasia 3 in the United States before vaccine introduction. *J Low Genit Tract Dis* 2012;16(4):471-9.
- Giuliano AR, Papenfuss M, Abrahamsen M, Denman C, de Zapien JG, Henze JL, et al. Human papillomavirus infection at the United States-Mexico border: implications for cervical cancer prevention and control. *Cancer Epidemiol Biomarkers Prev* 2001;10(11):1129-36.
- Giuliano AR, Harris R, Sedjo RL, Baldwin S, Roe D, Papenfuss MR, et al. Incidence, prevalence, and clearance of type-specific human papillomavirus infections: The Young Women's Health Study. *J Infect Dis* 2002;186(4):462-9.
- Goodman MT, Shvetsov YB, McDuffie K, Wilkens LR, Zhu X, Thompson PJ, et al. Prevalence, acquisition, and clearance of cervical human papillomavirus infection among women with normal cytology: Hawaii Human Papillomavirus Cohort Study. *Cancer Res* 2008;68(21):8813-24.
- Guo M, Sneige N, Silva EG, Jan YJ, Cogdell DE, Lin E, et al. Distribution and viral load of eight oncogenic types of human papillomavirus (HPV) and HPV 16 integration status in cervical intraepithelial neoplasia and carcinoma. *Mod Pathol* 2007;20(2):256-66.
- Hamlin-Douglas LK, Coutlee F, Roger M, Franco EL, Brassard P. Prevalence and age distribution of human papillomavirus infection in a population of Inuit women in Nunavik, Quebec. *Cancer Epidemiol Biomarkers Prev* 2008;17(11):3141-9.
- Hariri S, Unger ER, Sternberg M, Dunne EF, Swan D, Patel S, et al. Prevalence of genital human papillomavirus among females in the United States, the National Health And Nutrition Examination Survey, 2003-2006. *J Infect Dis* 2011;204(4):566-73.
- Hariri S, Steinau M, Rinas A, Gargano JW, Ludema C, Unger ER, et al. HPV genotypes in high grade cervical lesions and invasive cervical carcinoma as detected by two commercial DNA assays, North Carolina, 2001-2006. *PLoS ONE* 2012;7(3):e34044.
- Hariri S, Unger ER, Powell SE, Bauer HM, Bennett NM, Bloch KC, et al. Human papillomavirus genotypes in high-grade cervical lesions in the United States. *J Infect Dis* 2012;206(12):1878-86.
- Hopenhayn C, Christian A, Christian WJ, Watson M, Unger ER, Lynch CF, et al. Prevalence of human papillomavirus types in invasive cervical cancers from 7 US cancer registries before vaccine introduction. *J Low Genit Tract Dis* 2014;18(2):182-9.
- Hu L, Guo M, He Z, Thornton J, McDaniel LS, Hughson MD. Human papillomavirus genotyping and p16INK4a expression in cervical intraepithelial neoplasia of adolescents. *Mod Pathol* 2005;18(2):267-73.

- Insinga RP, Liaw KL, Johnson LG, Madeleine MM. A systematic review of the prevalence and attribution of human papillomavirus types among cervical, vaginal, and vulvar precancers and cancers in the United States. *Cancer Epidemiol Biomarkers Prev* 2008;17(7):1611-22.
- Jiang Y, Brassard P, Severini A, Goleski V, Santos M, Leamon A, et al. Type-specific prevalence of Human Papillomavirus infection among women in the Northwest Territories, Canada. *J Infect Public Health* 2011;4(5-6):219-27.
- Jiang Y, Brassard P, Severini A, Mao Y, Li YA, Laroche J, et al. The prevalence of human papillomavirus and its impact on cervical dysplasia in Northern Canada. *Infect Agent Cancer* 2013;8(1):25.
- Kelly JJ, Unger ER, Dunne EF, Murphy NJ, Tiesinga J, Koller KR, et al. HPV genotypes detected in cervical cancers from Alaska Native women, 1980-2007. *Int J Circumpolar Health* 2013;72:21115.
- Koushik A, Ghosh A, Duarte-Franco E, Forest P, Voyer H, Matlashewski G, et al. The p53 codon 72 polymorphism and risk of high-grade cervical intraepithelial neoplasia. *Cancer Detect Prev* 2005;29(4):307-16.
- Kulasingam SL, Hughes JP, Kiviat NB, Mao C, Weiss NS, Kuypers JM, et al. Evaluation of human papillomavirus testing in primary screening for cervical abnormalities: comparison of sensitivity, specificity, and frequency of referral. *JAMA* 2002;288(14):1749-57.
- Lee SH, Vigliotti VS, Pappu S. HPV infection among women in a representative rural and suburban population of the USA. *Int J Gynaecol Obstet* 2009;105(3):210-4.
- Likes W, Bloom L. Human papillomavirus distribution in vulvar intraepithelial neoplasia. *Appl Nurs Res* 2012;25(4):280-2.
- Logani S, Lu D, Quint WG, Ellenson LH, Pirog EC. Low-grade vulvar and vaginal intraepithelial neoplasia: correlation of histologic features with human papillomavirus DNA detection and MIB-1 immunostaining. *Mod Pathol* 2003;16(8):735-41.
- Malik ZA, Hailpern SM, Burk RD. Persistent antibodies to HPV virus-like particles following natural infection are protective against subsequent cervicovaginal infection with related and unrelated HPV. *Viral Immunol* 2009;22(6):445-9.
- Markowitz LE, Hariri S, Lin C, Dunne EF, Steinau M, McQuillan G, et al. Reduction in human papillomavirus (HPV) prevalence among young women following HPV vaccine introduction in the United States, National Health and Nutrition Examination Surveys, 2003-2010. *J Infect Dis* 2013;208(3):385-93.
- Moore RA, Ogilvie G, Fornika D, Moravan V, Brisson M, Amirabbasi-Beik M, et al. Prevalence and type distribution of human papillomavirus in 5,000 British Columbia women-implications for vaccination. *Cancer Causes Control* 2009;20:1387-96.
- Moscicki AB, Ellenberg JH, Farhat S, Xu J. Persistence of human papillomavirus infection in HIV-infected and -uninfected adolescent girls: risk factors and differences, by phylogenetic type. *J Infect Dis* 2004;190(1):37-45.
- Namugenyi SB, Balsan MJ, Glick SN, Jordan JA. Prevalence and genotype distribution of human papillomavirus in cytology specimens containing atypical glandular cells: a case-control study. *J Clin Virol* 2013;58(2):432-6.

- Ogilvie GS, Cook DA, Taylor DL, Rank C, Kan L, Yu A, et al. Population-based evaluation of type-specific HPV prevalence among women in British Columbia, Canada. *Vaccine* 2013;31(7):1129-33.
- Peyton CL, Gravitt PE, Hunt WC, Hundley RS, Zhao M, Apple RJ, et al. Determinants of genital human papillomavirus detection in a US population. *J Infect Dis* 2001;183(11):1554-64.
- Pirog EC, Kleter B, Olgac S, Bobkiewicz P, Lindeman J, Quint WG, et al. Prevalence of human papillomavirus DNA in different histological subtypes of cervical adenocarcinoma. *Am J Pathol* 2000;157(4):1055-62.
- Quint KD, de Koning MN, Geraets DT, Quint WG, Pirog EC. Comprehensive analysis of Human Papillomavirus and Chlamydia trachomatis in in-situ and invasive cervical adenocarcinoma. *Gynecol Oncol* 2009;114(3):390-4.
- Quint KD, de Koning MN, Van Doorn LJ, Quint WG, Pirog EC. HPV genotyping and HPV16 variant analysis in glandular and squamous neoplastic lesions of the uterine cervix. *Gynecol Oncol* 2010;117(2):297-301.
- Ralston Howe E, Li Z, McGlennen RC, Hellerstedt WL, Downs LS, Jr. Type-specific prevalence and persistence of human papillomavirus in women in the United States who are referred for typing as a component of cervical cancer screening. *Am J Obstet Gynecol* 2009;200(3):245-7.
- Reiter PL, Katz ML, Ruffin MT, Hade EM, Degraffenreid CR, Patel DA, et al. HPV prevalence among women from Appalachia: results from the CARE project. *PLoS One* 2013;8(8):e74276.
- Richardson H, Kelsall G, Tellier P, Voyer H, Abrahamowicz M, Ferenczy A, et al. The natural history of type-specific human papillomavirus infections in female university students. *Cancer Epidemiol Biomarkers Prev* 2003;12(6):485-90.
- Richardson H, Franco E, Pintos J, Bergeron J, Arella M, Tellier P. Determinants of low-risk and high-risk cervical human papillomavirus infections in Montreal University students. *Sex Transm Dis* 2000;27(2):79-86.
- Roteli-Martins CM, De Carvalho NS, Naud P, Teixeira J, Borba P, Derchain S, et al. Prevalence of human papillomavirus infection and associated risk factors in young women in Brazil, Canada, and the United States: a multicenter cross-sectional study. *Int J Gynecol Pathol* 2011;30(2):173-84.
- Saraiya M, Benard VB, Greek AA, Steinau M, Patel S, Massad LS, et al. Type-specific HPV and Pap test results among low income, underserved women: providing insights into management strategies. *Am J Obstet Gynecol* 2014;211(4):354.e1-354.e6.
- Schiffman M, Glass AG, Wentzensen N, Rush BB, Castle PE, Scott DR, et al. A long-term prospective study of type-specific human papillomavirus infection and risk of cervical neoplasia among 20,000 women in the Portland Kaiser Cohort Study. *Cancer Epidemiol Biomarkers Prev* 2011;20(7):1398-409.
- Schwartz SM, Daling JR, Shera KA, Madeleine MM, McKnight B, Galloway DA, et al. Human papillomavirus and prognosis of invasive cervical cancer: a population-based study. *J Clin Oncol* 2001;19(7):1906-15.
- Severini A, Jiang Y, Brassard P, Morrison H, Demers AA, Oguntuase E, et al. Type-specific prevalence of human papillomavirus in women screened for cervical cancer in Labrador, Canada. *Int J Circumpolar Health* 2013;72:19743.



- Shikary T, Bernstein DI, Jin Y, Zimet GD, Rosenthal SL, Kahn JA. Epidemiology and risk factors for human papillomavirus infection in a diverse sample of low-income young women. *J Clin Virol* 2009;46(2):107-11.
- Sinno AK, Saraiya M, Thompson TD, Hernandez BY, Goodman MT, Steinau M, et al. Human papillomavirus genotype prevalence in invasive vaginal cancer from a registry-based population. *Obstet Gynecol* 2014;123(4):817-21.
- Srodon M, Stoler MH, Baber GB, Kurman RJ. The distribution of low and high-risk HPV types in vulvar and vaginal intraepithelial neoplasia (VIN and VaIN). *Am J Surg Pathol* 2006;30(12):1513-8.
- Sutton BC, Allen RA, Moore WE, Dunn ST. Distribution of human papillomavirus genotypes in invasive squamous carcinoma of the vulva. *Mod Pathol* 2008;21(3):345-54.
- Tarkowski TA, Koumans EH, Sawyer M, Pierce A, Black CM, Papp JR, et al. Epidemiology of human papillomavirus infection and abnormal cytologic test results in an urban adolescent population. *J Infect Dis* 2004;189(1):46-50.
- Thomas KK, Hughes JP, Kuypers JM, Kiviat NB, Lee SK, Adam DE, et al. Concurrent and sequential acquisition of different genital human papillomavirus types. *J Infect Dis* 2000;182(4):1097-102.
- Tricco AC, Ng CH, Gilca V, Anonychuk A, Pham B, Berliner S. Canadian oncogenic human papillomavirus cervical infection prevalence: systematic review and meta-analysis. *BMC Infect Dis* 2011;11:235.
- Wentzensen N, Schiffman M, Dunn T, Zuna RE, Gold MA, Allen RA, et al. Multiple human papillomavirus genotype infections in cervical cancer progression in the study to understand cervical cancer early endpoints and determinants. *Int J Cancer* 2009;125(9):2151-8.
- Wentzensen N, Wilson LE, Wheeler CM, Carreon JD, Gravitt PE, Schiffman M, et al. Hierarchical clustering of human papilloma virus genotype patterns in the ASCUS-LSIL triage study. *Cancer Res* 2010;70(21):8578-86.
- Wheeler CM, Hunt WC, Joste NE, Key CR, Quint WG, Castle PE. Human papillomavirus genotype distributions: implications for vaccination and cancer screening in the United States. *J Natl Cancer Inst* 2009;101(7):475-87.
- Wheeler CM, Hunt WC, Cuzick J, Langsfeld E, Pearse A, Montoya GD, et al. A population-based study of human papillomavirus genotype prevalence in the United States: baseline measures prior to mass human papillomavirus vaccination. *Int J Cancer* 2013;132(1):198-207.
- Widdice LE, Brown DR, Bernstein DI, Ding L, Patel D, Shew M, et al. Prevalence of human papillomavirus infection in young women receiving the first quadrivalent vaccine dose. *Arch Pediatr Adolesc Med* 2012;166(8):774-6.
- Winer RL, Lee SK, Hughes JP, Adam DE, Kiviat NB, Koutsky LA. Genital human papillomavirus infection: incidence and risk factors in a cohort of female university students. *Am J Epidemiol* 2003;157(3):218-26.
- Winer RL, Hughes JP, Feng Q, O'Reilly S, Kiviat NB, Holmes KK, et al. Condom use and the risk of genital human papillomavirus infection in young women. *N Engl J Med* 2006;354(25):2645-54.
- Wright AA, Howitt BE, Myers AP, Dahlberg SE, Palesscandolo E, Van HP, et al. Oncogenic mutations in cervical cancer: genomic differences between adenocarcinomas and squamous cell carcinomas of the cervix. *Cancer* 2013;119(21):3776-83.

Wright JD, Li J, Gerhard DS, Zhang Z, Huettner PC, Powell MA, et al. Human papillomavirus type and tobacco use as predictors of survival in early stage cervical carcinoma. *Gynecol Oncol* 2005;98(1):84-91.

Wright TC, Jr., Stoler MH, Sharma A, Zhang G, Behrens C, Wright TL. Evaluation of HPV-16 and HPV-18 genotyping for the triage of women with high-risk HPV+ cytology-negative results. *Am J Clin Pathol* 2011;136(4):578-86.

Zuna RE, Allen RA, Moore WE, Lu Y, Mattu R, Dunn ST. Distribution of HPV genotypes in 282 women with cervical lesions: evidence for three categories of intraepithelial lesions based on morphology and HPV type. *Mod Pathol* 2007;20(2):167-74.

## 1.6 World

Alemanly L, de SS, Tous S, Quint W, Vallejos C, Shin HR, et al. Time trends of human papillomavirus types in invasive cervical cancer, from 1940 to 2007. *Int J Cancer* 2014;135(1):88-95.

Bernard E, Pons-Salort M, Favre M, Heard I, Delarocque-Astagneau E, Guillemot D, et al. Comparing human papillomavirus prevalences in women with normal cytology or invasive cervical cancer to rank genotypes according to their oncogenic potential: a meta-analysis of observational studies. *BMC Infect Dis* 2013;13(1):373.

Bosch FX, Burchell AN, Schiffman M, Giuliano AR, de Sanjose S, Bruni L, et al. Epidemiology and natural history of human papillomavirus infections and type-specific implications in cervical neoplasia. *Vaccine* 2008;26 Suppl 10:K1-16.

Bruni L, Diaz M, Castellsague X, Ferrer E, Bosch FX, de Sanjose S. Cervical human papillomavirus prevalence in 5 continents: meta-analysis of 1 million women with normal cytological findings. *J Infect Dis* 2010;202(12):1789-99.

Bzhalava D, Guan P, Franceschi S, Dillner J, Clifford G. A systematic review of the prevalence of mucosal and cutaneous human papillomavirus types. *Virology* 2013;445(1-2):224-31.

Castellsague X, Diaz M, de Sanjose S, Munoz N, Herrero R, Franceschi S, et al. Worldwide human papillomavirus etiology of cervical adenocarcinoma and its cofactors: implications for screening and prevention. *J Natl Cancer Inst* 2006;98(5):303-15.

Clifford GM, Gallus S, Herrero R, Munoz N, Snijders PJ, Vaccarella S, et al. Worldwide distribution of human papillomavirus types in cytologically normal women in the International Agency for Research on Cancer HPV prevalence surveys: a pooled analysis. *Lancet* 2005;366(9490):991-8.

de Sanjose S, Diaz M, Castellsague X, Clifford G, Bruni L, Munoz N, et al. Worldwide prevalence and genotype distribution of cervical human papillomavirus DNA in women with normal cytology: a meta-analysis. *Lancet Infect Dis* 2007;7(7):453-9.

de Sanjose S, Quint WG, Alemanly L, Geraets DT, Klaustermeier JE, Lloveras B, et al. Human papillomavirus genotype attribution in invasive cervical cancer: a retrospective cross-sectional worldwide study. *Lancet Oncol* 2010;11(11):1048-56.

de Sanjose S, Alemanly L, Ordi J, Tous S, Alejo M. Worldwide human papillomavirus genotype attribution in over 2000 cases of intraepithelial and invasive lesions of the vulva. *Eur J Cancer* 2013;49(16):3450-61.

- De Vuyst H, Clifford GM, Nascimento MC, Madeleine MM, Franceschi S. Prevalence and type distribution of human papillomavirus in carcinoma and intraepithelial neoplasia of the vulva, vagina and anus: a meta-analysis. *Int J Cancer* 2009;124(7):1626-36.
- Garland SM, Insinga RP, Sings HL, Haupt RM, Joura EA. Human papillomavirus infections and vulvar disease development. *Cancer Epidemiol Biomarkers Prev* 2009;18(6):1777-84.
- Guan P, Howell-Jones R, Li N, Bruni L, de SS, Franceschi S, et al. Human papillomavirus types in 115,789 HPV-positive women: A meta-analysis from cervical infection to cancer. *Int J Cancer* 2012;131(10):2349-59.
- Li N, Franceschi S, Howell-Jones R, Snijders PJ, Clifford GM. Human papillomavirus type distribution in 30,848 invasive cervical cancers worldwide: Variation by geographical region, histological type and year of publication. *Int J Cancer* 2011;128(4):927-35.
- Liu P, Xu L, Sun Y, Wang Z. The prevalence and risk of human papillomavirus infection in pregnant women. *Epidemiol Infect* 2014;142(8):1567-78.
- Munoz N, Bosch FX, Castellsague X, Diaz M, de Sanjose S, Hammouda D, et al. Against which human papillomavirus types shall we vaccinate and screen? The international perspective. *Int J Cancer* 2004;111(2):278-85.
- Pirog EC, Lloveras B, Molijn A, Tous S, Guimera N, Alejo M, et al. HPV prevalence and genotypes in different histological subtypes of cervical adenocarcinoma, a worldwide analysis of 760 cases. *Mod Pathol* 2014;27(12):1559-67.
- Smith JS, Lindsay L, Hoots B, Keys J, Franceschi S, Winer R, et al. Human papillomavirus type distribution in invasive cervical cancer and high-grade cervical lesions: a meta-analysis update. *Int J Cancer* 2007;121(3):621-32.
- Smith JS, Backes DM, Hoots BE, Kurman RJ, Pimenta JM. Human papillomavirus type-distribution in vulvar and vaginal cancers and their associated precursors. *Obstet Gynecol* 2009;113(4):917-24.
